# Supplementary material for: Continuous flow synthesis of diaryl ketones by coupling of aryl Grignard reagents with acyl chlorides under mild conditions in the ecofriendly solvent 2-methyltetrahydrofuran
Source: Royal Society of Chemistry journal article supplement (doi:10.1039/c8ra07447j), 2019-01-01

### Supporting information

All solvents and reagents were obtained from commercial suppliers. Reagents were used without purification, and solvents were dried through the general protocol reported by Williams and Lawton <sup>[1]</sup>. <sup>1</sup>H (400 MHz) NMR spectra were recorded on a Bruker AVIII 400 MHz spectrometer. Chemical shifts are reported in ppm using the 7.26 signal of CDCl<sub>3</sub> (<sup>1</sup>H-NMR) or the 2.51 signal of DMSO-*d*<sub>6</sub> (<sup>1</sup>H-NMR) as references and the 77.0 signal of CDCl<sub>3</sub> (<sup>13</sup>C-NMR) and the 40.0 signal of DMSO-*d*<sub>6</sub> (<sup>13</sup>C-NMR) as references. ESI Mass spectra (MS) were obtained on a Agilent 6110 Mass Spectrometer (for **3a** – **3o**, **4b** - **4e** and **4g** – **4h**) and Waters MALDI SYNAPT Q-TOF Mass Spectrometer (for **4f**). As for GC-MS analysis of **3a** from batch or flow, reaction samples were diluted with 1 ml ethyl acetate and analyzed using a GC-TOFMS apparatus (LECO, MI, USA) equipped with a HV-5 column (Agilent, Santa Clara, CA, USA), and the column temperatures were programmed from 60 to 250 °C at a rate of 20 °C/min and maintained at 250 °C for 10 mins.

Flow experiments were performed on a self-assembled continuous flow set-up (Figures S1 and S2). Two HPLC pumps (Sanotac AP0010 and AP0012) were used to deliver the reactants continuously into the flow reactor. A T-shaped mixer (Peek 1/32" inner diameter) was used to mix two separate feed streams and the mixture was channeled into the flow reactor. The coil reactor was made of PTFE tubing (Poly tetrafluoroethylene, 1/16" inner diameter) with an internal volume of 120.0 mL.

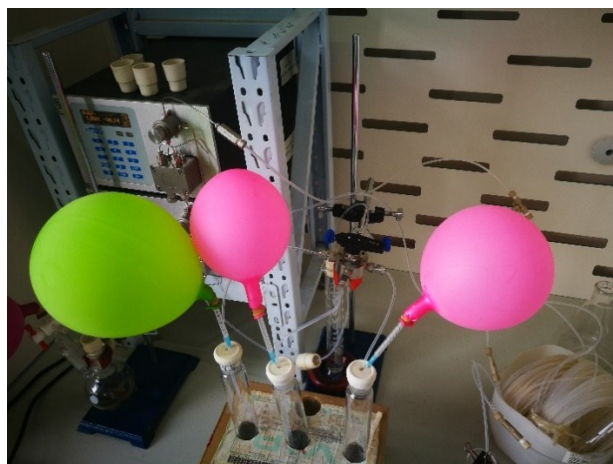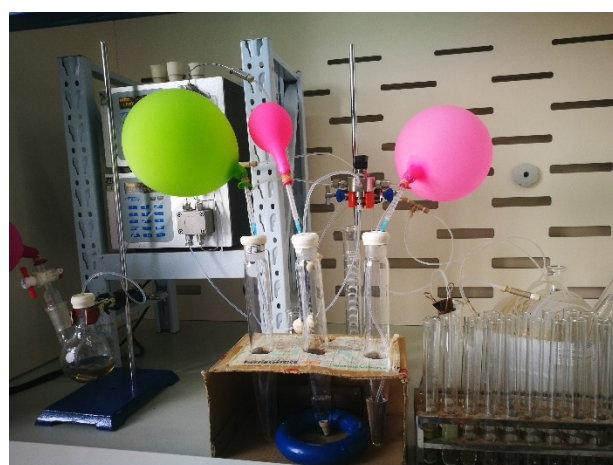

Figure S1 Continuous flow reaction system used in this study.

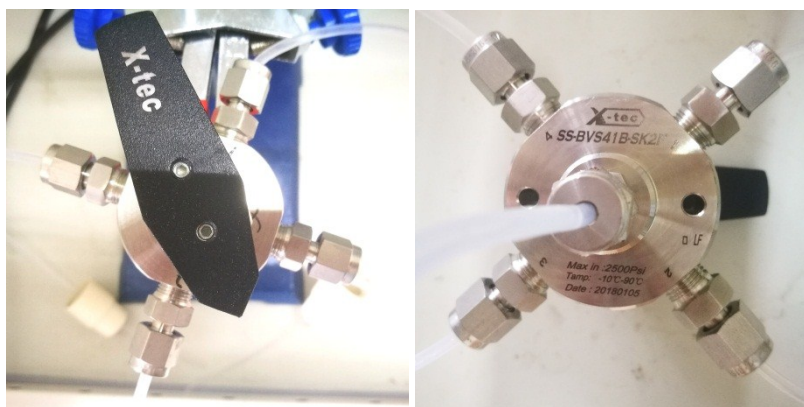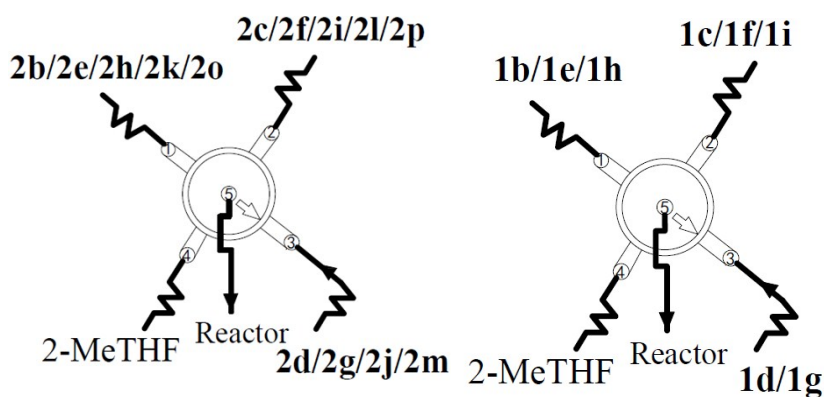

Figure S2 Five-way valve

### Procedure for the coupling between phenylmagnesium bromide and benzoyl chloride in batch

To a stirred solution of phenylmagnesium bromide **1a** (0.6 M in 2-MeTHF, 10 mL, 6 mmol) at ambient temperature was added dropwise a solution of benzoyl chloride **2b** (465  $\mu$ L, 4 mmol) in dry 2-MeTHF (10 mL) for 3 minutes with the stirring rate of 1300 r/min (85-1 Magnetic stirrer, Shanghai Sile Instrument Co., Ltd. Shanghai, China). The internal temperature of the reaction increased from 25  $^{\circ}$ C to 40  $^{\circ}$ C indicated by a thermometer. The reaction mixture was stirred for 60 mins at ambient temperature and quenched with 1N HCl (6 mL) solution, the organic layer was separated and concentrated in vacuo to afford the crude product. The residual aqueous layer was extracted with ethyl acetate (3  $\times$  15 mL), the crude product was dissolved in the combined ethyl acetate phase and then dried (MgSO<sub>4</sub>), filtered, the ethyl acetate was evaporated in vacuo and chromatographed on silica gel (200-300 mesh, LiangChen GuiYuan Inc. Huoshan, China) with 2% of EtOAc in Hexanes as eluent to yield benzophenone (248 mg, 34%) as solid.

## Optimal procedure for the coupling between phenylmagnesium bromide and benzoyl chloride in continuous flow

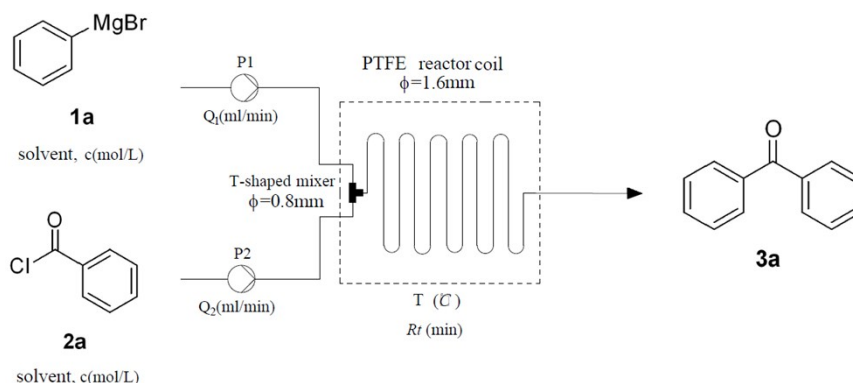

Pilot optimization studies were performed using phenylmagnesium bromide and benzoyl chloride using a simple continuous flow system. The temperature, solvent, reactant equivalents, and residence times were methodically varied and each reaction was monitored using TLC analysis. The final conditions were selected based on the best percent conversion of benzoyl chloride to benzophenone and were used for the other substrates.

A solution of phenylmagnesium bromide **1a** (1 mL/min, 0.6 M, 2-MeTHF, 10 mL) and a solution of benzoyl chloride **2a** (1 mL/min, 0.4 M, 2-MeTHF, 10 mL) were combined in the T-shaped mixer and reacted in the coil reactor for 60 min at room temperature. The reaction stream (20 mL) was collected at a steady state in a flask with 1N HCl (6 mL) after 1/6 of the reactor volume had eluted. The organic layer was separated and concentrated *in vacuo* to afford the crude product, with recycling of 2-MeTHF. The residual aqueous layer was extracted with ethyl acetate (3×15 mL), the crude product was dissolved in the combined ethyl acetate phase and then dried (MgSO<sub>4</sub>), filtered, the ethyl acetate was evaporated *in vacuo* and chromatographed on silica gel (200-300 mesh, LiangChen GuiYuan Inc. Huoshan, China) with 2% of EtOAc in Hexanes as eluent to yield benzophenone (619 mg, 85%) as solid. <sup>1</sup>H NMR (400 MHz, DMSO-*d*<sub>6</sub>)  $\delta$ : 7.75 - 7.73 (m, 4H), 7.71 - 7.67 (m, 2H), 7.59 - 7.55 (m, 4H); MS (ESI): *m/z* calcd. for C<sub>13</sub>H<sub>11</sub>O [M+H]<sup>+</sup> 183.1, found 183.1.

**General procedure for synthesis of 3b–o through the reaction of phenylmagnesium bromide 1a with acyl chloride 2b–o under continuous flow**

### parallel system (exemplified by 3b-3d)

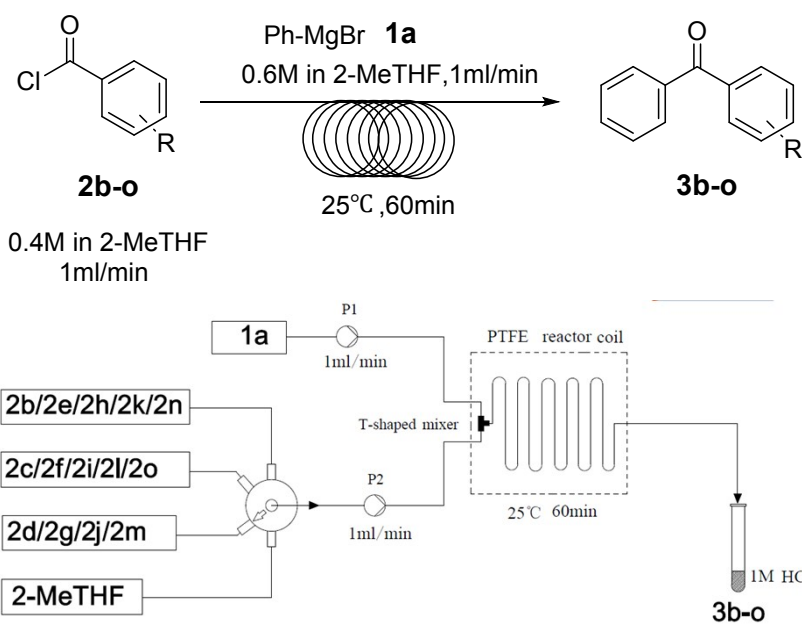

A solution of phenylmagnesium bromide **1a** (1 mL/min, 0.6 M, 2-MeTHF, 10 mL) and a solution of 2-methylbenzoyl chloride **2b** (1 mL/min, 0.4 M, 2-MeTHF, 10 mL) were pumped into the reactor by P1 (Sanotac AP0010) and P2 (Sanotac AP0012) respectively. After 10 min, P1 and P2 were stopped, the valve was transferred from **2b** to 2-MeTHF, and 2-MeTHF was delivered at the rate of 2 mL/min for 5 min by P2. After P2 was stopped, the valve was transferred from 2-MeTHF to **2c**, and P1 and P2 worked at the rate of 1 mL/min for 10 min, and then stopped. After the valve was transferred from **2c** to 2-MeTHF, P2 worked at the rate of 2 mL/min for 5 min, then stopped. Then the valve was transferred from 2-MeTHF to **2d**, and P1 and P2 pumped **1a** and **2d** at the rate of 1 mL/min for 10 min. The reaction stream (20 mL) for **3b**, **3c** and **3d** were collected separately at steady states in a flask with 1N HCl (6 mL) after 1/6 of the reactor volume had eluted. The organic layer was separated and concentrated *in vacuo* to afford the crude product, with recycling of 2-MeTHF. The residual aqueous layer was extracted with ethyl acetate (3 × 15 mL), the crude product was dissolved in the combined ethyl acetate phase and then dried (MgSO<sub>4</sub>), filtered, the ethyl acetate was evaporated *in vacuo* and chromatographed on silica gel (200-300 mesh, LiangChen GuiYuan Inc. Huoshan, China) with 2% of EtOAc in Hexanes as eluent to yield **3b** (620mg, 79%), **3c** (447mg, 57%) and **3d** (502 mg, 64%) respectively.

*phenyl(o-tolyl)methanone (3b)*: Yield 79%, pale yellow oil;  $^1\text{H}$  NMR (400 MHz, DMSO- $d_6$ )  $\delta$ : 7.72 - 7.66 (m, 3H), 7.57 - 7.54 (m, 2H), 7.49 - 7.45 (m, 1H), 7.39 - 7.29 (m, 3H), 2.24 (s, 3H);  $^{13}\text{C}$  NMR (100MHz, DMSO- $d_6$ )  $\delta$ : 198.2, 138.8, 137.5, 136.2, 134.0, 131.4, 130.8, 130.1, 129.3, 128.5, 125.9, 19.9; MS (ESI):  $m/z$  calcd. for  $\text{C}_{14}\text{H}_{13}\text{O}$   $[\text{M}+\text{H}]^+$  197.1, found 197.1.

*phenyl(m-tolyl)methanone (3c)*: Yield 57%;  $^1\text{H}$  NMR (400 MHz,  $\text{CDCl}_3$ )  $\delta$ : 7.81 - 7.79 (m, 2H), 7.63 - 7.62(m, 1H), 7.59 - 7.57 (m, 2H), 7.50 - 7.46 (m, 2H), 7.41 - 7.34 (m, 2H), 2.42 (s, 3H);  $^{13}\text{C}$  NMR (100 MHz,  $\text{CDCl}_3$ )  $\delta$ :196.9 , 138.2, 137.8, 137.7, 133.2, 132.3, 130.4, 130.0, 128.2, 128.1 , 127.3, 21.4; MS (ESI):  $m/z$  calcd. for  $\text{C}_{14}\text{H}_{13}\text{O}$   $[\text{M}+\text{H}]^+$  197.1, found 197.0.

*phenyl(p-tolyl)methanone (3d)*: Yield 64%;  $^1\text{H}$  NMR (400 MHz,  $\text{CDCl}_3$ )  $\delta$ : 7.80 -7.77 (m, 2H), 7.72 (d,  $J = 8.4$  Hz, 2H), 7.60 - 7.55 (m, 1H), 7.50 - 7.45 (m, 2H), 7.28 (d,  $J = 7.6$  Hz, 2H), 2.44 (s, 3H);  $^{13}\text{C}$  NMR (100 MHz,  $\text{CDCl}_3$ )  $\delta$ : 196.5, 143.2, 138.0, 134.9, 132.1, 130.3, 129.9, 129.0, 128.2, 21.7; MS (ESI):  $m/z$  calcd. for  $\text{C}_{14}\text{H}_{13}\text{O}$   $[\text{M}+\text{H}]^+$  197.1, found197.1.

*(2-fluorophenyl)(phenyl)methanone (3e)*: Yield 85%;  $^1\text{H}$  NMR (400 MHz, DMSO- $d_6$ )  $\delta$ : 7.79 - 7.65 (m, 4H), 7.61 - 7.55 (m, 3H), 7.42 - 7.37 (m, 2H);  $^{13}\text{C}$  NMR (100 MHz, DMSO- $d_6$ )  $\delta$ : 193.2, 159.7 (d,  $J_{\text{C,F}} = 248.0$  Hz), 137.2, 134.4, 134.1 (d,  $J_{\text{C,F}} = 8.0$  Hz), 130.9 (d,  $J_{\text{C,F}} = 2.8$  Hz), 129.9, 129.4, 126.9 (d,  $J_{\text{C,F}} = 15.0$  Hz), 125.3 (d,  $J_{\text{C,F}} = 3.0$  Hz), 116.7 (d,  $J_{\text{C,F}} = 21.2$  Hz); MS (ESI):  $m/z$  calcd. for  $\text{C}_{13}\text{H}_9\text{FNaO}$   $[\text{M}+\text{Na}]^+$  223.1, found 223.1.

*(3-fluorophenyl)(phenyl)methanone (3f)*: Yield 65%;  $^1\text{H}$  NMR (400 MHz,  $\text{CDCl}_3$ )  $\delta$ : 7.81 - 7.79 (m, 2H), 7.63 - 7.56 (m, 2H), 7.52 - 7.44 (m, 4H), 7.31 - 7.27 (m, 1H);  $^{13}\text{C}$  NMR (100 MHz,  $\text{CDCl}_3$ )  $\delta$ : 195.3 (d,  $J_{\text{C,F}} = 2.0$  Hz), 162.5 (d,  $J_{\text{C,F}} = 246.7$  Hz), 139.7 (d,  $J_{\text{C,F}} = 6.1$  Hz), 137.1, 132.8, 130.0, 129.9, 128.4, 125.8 (d,  $J_{\text{C,F}} = 3.0\text{Hz}$ ), 119.4 (d,  $J_{\text{C,F}} = 21.2$  Hz), 116.8 (d,  $J_{\text{C,F}} = 22.3$  Hz); MS (ESI):  $m/z$  calcd. for  $\text{C}_{13}\text{H}_{10}\text{FO}$   $[\text{M}+\text{H}]^+$  201.1, found 201.1.

*(4-fluorophenyl)(phenyl)methanone (3g)*: Yield 55%;  $^1\text{H}$  NMR (400 MHz, DMSO- $d_6$ )  $\delta$ : 7.85 - 7.81 (m, 2H), 7.74 - 7.67 (m, 3H), 7.60 - 7.55 (m, 2H), 7.42 - 7.38(m, 2H);  $^{13}\text{C}$  NMR (100 MHz, DMSO- $d_6$ )  $\delta$ : 194. 9, 165.2 (d,  $J_{\text{C,F}} = 249.7$  Hz), 137.4, 134.0 (d,

$J_{C,F} = 2.9$  Hz), 133.1 (d,  $J_{C,F} = 7.9$  Hz), 133.0, 130.0, 129.1, 116.1 (d,  $J_{C,F} = 21.8$  Hz); MS (ESI):  $m/z$  calcd. for  $C_{13}H_{10}FO$   $[M+H]^+$  201.1, found 201.1.

(3-chlorophenyl)(phenyl)methanone (**3h**): Yield 82%;  $^1H$  NMR (400 MHz, DMSO- $d_6$ )  $\delta$ : 7.78 - 7.67 (m, 6H), 7.63 - 7.58 (m, 3H);  $^{13}C$  NMR (100 MHz, DMSO- $d_6$ )  $\delta$ : 194.9, 139.5, 136.8, 133.9, 133.6, 132.8, 131.0, 130.2, 129.4, 129.2, 128.7; MS (ESI):  $m/z$  calcd. for  $C_{13}H_{10}ClO$   $[M+H]^+$  217.0, found 217.0.

phenyl(3-(trifluoromethyl)phenyl)methanone (**3i**): Yield 77%;  $^1H$  NMR (400 MHz, DMSO- $d_6$ )  $\delta$ : 8.08 - 8.02 (m, 3H), 7.85 - 7.71 (m, 4H), 7.62 - 7.59 (m, 2H);  $^{13}C$  NMR (100 MHz, DMSO- $d_6$ )  $\delta$ : 195.0, 138.4, 136.7, 134.0, 133.7, 130.4, 130.3, 129.8 (q,  $J_{C,F} = 32.0$  Hz), 129.4 (q,  $J_{C,F} = 3.6$  Hz), 129.2, 126.1 (q,  $J_{C,F} = 3.8$  Hz), 124.2 (q,  $J_{C,F} = 270.8$  Hz); MS (ESI):  $m/z$  calcd. for  $C_{14}H_{10}F_3O$   $[M+H]^+$  251.1, found 251.1.

phenyl(4-(trifluoromethyl)phenyl)methanone (**3j**): Yield 83%;  $^1H$  NMR (400 MHz,  $CDCl_3$ )  $\delta$ : 7.90 (d,  $J = 7.6$  Hz, 2H), 7.82 - 7.80 (m, 2H), 7.76 (d,  $J = 7.6$  Hz, 2H), 7.65 - 7.61 (m, 1H), 7.54 - 7.50 (m, 2H);  $^{13}C$  NMR (100 MHz,  $CDCl_3$ )  $\delta$ : 195.5, 140.8, 136.8, 133.9, 133.6, 133.0, 130.1 (d,  $J_{C,F} = 3.0$  Hz), 128.5, 125.3 (q,  $J_{C,F} = 3.8$  Hz), 122.3; MS (ESI):  $m/z$  calcd. for  $C_{14}H_{10}F_3O$   $[M+H]^+$  251.1, found 251.0.

(3-methoxyphenyl)(phenyl)methanone (**3k**): Yield 60%;  $^1H$  NMR (400 MHz, DMSO- $d_6$ )  $\delta$ : 7.76 - 7.74 (m, 2H), 7.70 - 7.67 (m, 1H), 7.59 - 7.55 (m, 2H), 7.50 - 7.46 (m, 1H), 7.28 - 7.25 (m, 3H), 3.82 (s, 3H);  $^{13}C$  NMR (100 MHz, DMSO- $d_6$ )  $\delta$ : 196.0, 159.7, 138.9, 137.5, 133.2, 130.2, 130.1, 129.0, 122.6, 119.1, 114.6, 55.8; MS (ESI):  $m/z$  calcd. for  $C_{14}H_{13}O_2$   $[M+H]^+$  213.1, found 213.0.

(4-methoxyphenyl)(phenyl)methanone (**3l**): Yield 61%;  $^1H$  NMR (400 MHz, DMSO- $d_6$ )  $\delta$ : 7.78 - 7.74 (m, 2H), 7.70 - 7.64 (m, 3H), 7.58 - 7.53 (m, 2H), 7.12 - 7.10 (m, 2H), 3.87 (s, 3H);  $^{13}C$  NMR (100 MHz, DMSO- $d_6$ )  $\delta$ : 194.9, 163.4, 138.2, 132.7, 132.6, 129.8, 129.7, 128.9, 114.4, 56.0; MS (ESI):  $m/z$  calcd. for  $C_{14}H_{13}O_2$   $[M+H]^+$  213.1, found 213.1.

4-benzoylbenzotrile (**3m**): Yield 43%;  $^1H$  NMR (400 MHz,  $CDCl_3$ )  $\delta$ : 7.89 - 7.87 (m, 2H), 7.81 - 7.78 (m, 4H), 7.67 - 7.62 (m, 1H), 7.54 - 7.50 (m, 2H);  $^{13}C$  NMR (100 MHz,  $CDCl_3$ )  $\delta$ : 195.0, 141.3, 136.4, 133.3, 132.2, 130.2, 130.1, 128.6, 118.0, 115.7; MS (ESI):  $m/z$  calcd. for  $C_{14}H_{10}NO$   $[M+H]^+$  208.1, found 208.1.

*naphthalen-2-yl(phenyl)methanone (3n)*: Yield 42%;  $^1\text{H}$  NMR (400 MHz,  $\text{CDCl}_3$ )  $\delta$ : 8.27 (s, 1H), 7.95 - 7.90 (m, 4H), 7.88 - 7.85(m, 2H), 7.65 - 7.60 (m, 2H), 7.58 - 7.49 (m, 3H);  $^{13}\text{C}$  NMR (100 MHz,  $\text{CDCl}_3$ )  $\delta$ : 196.7, 137.9, 135.3, 134.8, 132.4, 132.3, 131.9, 130.1, 129.4, 128.34, 128.32, 128.29, 127.8, 126.8, 125.8; MS (ESI):  $m/z$  calcd. for  $\text{C}_{17}\text{H}_{13}\text{O}$   $[\text{M}+\text{H}]^+$  233.1, found 233.0.

*2-(3-benzoylphenyl)propanenitrile (3o)*: Yield 56%;  $^1\text{H}$ NMR (400MHz,  $\text{DMSO}-d_6$ )  $\delta$ : 7.80 - 7.70 (m, 6H), 7.65 - 7.58 (m, 3H), 4.48 (q,  $J = 7.2\text{Hz}$ , 1H), 1.59 (d,  $J = 7.2\text{ Hz}$ , 3H);  $^{13}\text{C}$  NMR (100 MHz,  $\text{DMSO}-d_6$ )  $\delta$ : 195.8, 138.7, 138.1, 137.2, 133.4, 131.5, 130.2, 129.9, 129.7, 129.1, 128.3, 122.5, 30.2, 21.1; MS (ESI):  $m/z$  calcd. for  $\text{C}_{16}\text{H}_{14}\text{NO}$   $[\text{M}+\text{H}]^+$  236.1, found 236.1.

**General procedure for synthesis of 4b-h through the reaction of aryl Grignard reagents 1b-h with 2-fluorobenzoyl chloride 2e under continuous flow parallel system (exemplified by 4b-4d)**

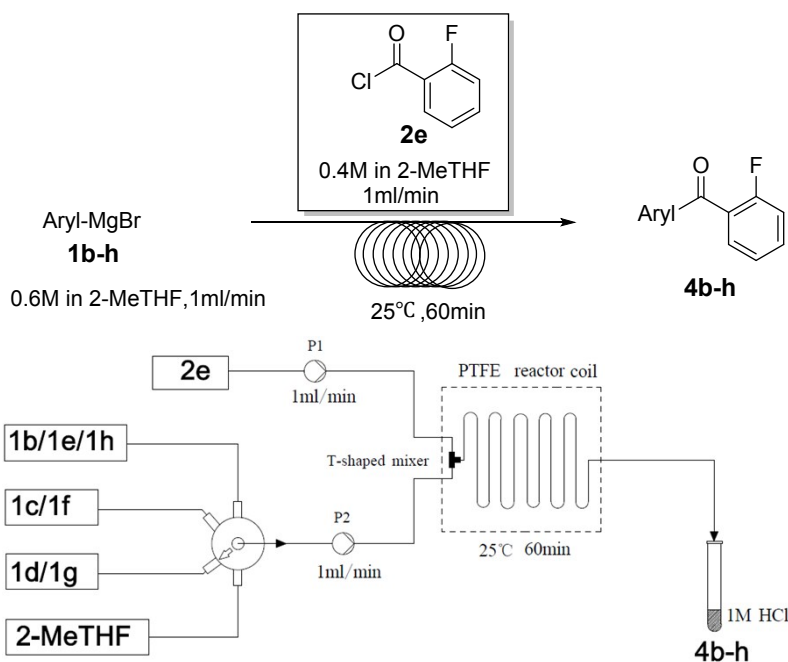

A solution of (4-methoxyphenyl)magnesium bromide **1b** (1 mL/min, 0.6 M, 2-MeTHF, 10 mL) and a solution of 2-fluorobenzoyl chloride **2e** (1 mL/min, 0.4 M, 2-



MeTHF, 10 mL) were pumped into the reactor by P1 (Sanotac AP0010) and P2 (Sanotac AP0012) respectively. After 10 min, P1 and P2 were stopped, the valve was transferred from **1b** to 2-MeTHF, and 2-MeTHF was delivered at the rate of 2 mL/min for 5 min by P2. After P2 was stopped, the valve was transferred from 2-MeTHF to **1c**, and P1 and P2 worked at the rate of 1 mL/min for 10 min, and then stopped. After the valve was transferred from **1c** to 2-MeTHF, P2 worked at the rate of 2 mL/min for 5 min, then stopped. Then the valve was transferred from 2-MeTHF to **1d**, and P1 and P2 pumped **2e** and **1d** at the rate of 1 mL/min for 10 min. The reaction stream (20 mL) for **4b**, **4c** and **4d** were collected separately at steady states in a flask with 1N HCl (6 mL) after 1/6 of the reactor volume had eluted. The organic layer was separated and concentrated *in vacuo* to afford the crude product, with recycling of 2-MeTHF. The residual aqueous layer was extracted with ethyl acetate (3 × 15 mL), the crude product was dissolved in the combined ethyl acetate phase and then dried (MgSO<sub>4</sub>), filtered, the ethyl acetate were evaporated *in vacuo* and chromatographed on silica gel (200-300 mesh, LiangChen GuiYuan Inc. Huoshan, China) with 2% of EtOAc in Hexanes as eluent to yield **4b** (396 mg, 43%), **4c** (814 mg, 95%) and **4d** (694 mg, 81%) respectively.

(2-fluorophenyl)(4-methoxyphenyl)methanone (**4b**): Yield 43%; <sup>1</sup>H NMR (400 MHz, DMSO-*d*<sub>6</sub>) δ: 7.76 (d, *J* = 8.8 Hz, 2H), 7.69 - 7.64 (m, 1H), 7.56 - 7.53 (m, 1H), 7.41 - 7.37 (m, 2H), 7.11 (d, *J* = 8.8 Hz, 2H), 3.87 (s, 3H); <sup>13</sup>C NMR (100 MHz, DMSO-*d*<sub>6</sub>) δ: 191.5, 164.3, 159.4 (d, *J*<sub>C,F</sub> = 246.5 Hz), 133.5 (d, *J*<sub>C,F</sub> = 8.3 Hz), 132.4, 130.5 (d, *J*<sub>C,F</sub> = 3.1 Hz), 129.9, 127.5 (d, *J*<sub>C,F</sub> = 15.7 Hz), 125.2 (d, *J*<sub>C,F</sub> = 3.2 Hz), 116.6 (d, *J*<sub>C,F</sub> = 21.3 Hz), 114.7, 56.2; MS (ESI): *m/z* calcd. for C<sub>14</sub>H<sub>12</sub>FO<sub>2</sub> [M+H]<sup>+</sup> 231.1, found 231.1.

(2-fluorophenyl)(*o*-tolyl)methanone (**4c**): Yield 95%; <sup>1</sup>H NMR (400 MHz, DMSO-*d*<sub>6</sub>) δ: 7.72 - 7.67 (m, 1H), 7.61 - 7.57 (m, 1H), 7.52 - 7.48 (m, 1H), 7.40 - 7.29 (m, 5H), 2.39 (s, 3H); <sup>13</sup>C NMR (100 MHz, DMSO-*d*<sub>6</sub>) δ: 195.1, 160.5 (d, *J*<sub>C,F</sub> = 251.0 Hz), 138.5, 137.5, 135.0 (d, *J*<sub>C,F</sub> = 8.7 Hz), 132.1, 131.9, 131.4 (d, *J*<sub>C,F</sub> = 1.8 Hz), 130.1, 127.6 (d, *J*<sub>C,F</sub> = 12.4 Hz), 126.3, 125.3 (d, *J*<sub>C,F</sub> = 3.6 Hz), 117.0 (d, *J*<sub>C,F</sub> = 21.4 Hz), 20.54; MS (ESI): *m/z* calcd. for C<sub>14</sub>H<sub>12</sub>FO [M+H]<sup>+</sup> 215.1, found 215.1.

(2-fluorophenyl)(p-tolyl)methanone (**4d**): Yield 81%; <sup>1</sup>H NMR (400 MHz, DMSO-*d*<sub>6</sub>) δ: 7.68 - 7.64 (m, 3H), 7.57 - 7.54 (m, 1H), 7.41 - 7.36 (m, 4H), 2.41 (s, 3H); <sup>13</sup>C NMR (100 MHz, DMSO-*d*<sub>6</sub>) δ: 192.7, 159.6 (d, *J*<sub>C,F</sub> = 247.1 Hz), 145.0, 134.7, 133.8 (d, *J*<sub>C,F</sub> = 8.3 Hz), 130.7 (d, *J*<sub>C,F</sub> = 3.0 Hz), 130.1, 129.9, 127.2 (d, *J*<sub>C,F</sub> = 15.4 Hz), 125.3 (d, *J*<sub>C,F</sub> = 3.3 Hz), 116.7 (d, *J*<sub>C,F</sub> = 21.4 Hz), 21.7; MS (ESI): *m/z* calcd. for C<sub>14</sub>H<sub>12</sub>FO [M+H]<sup>+</sup> 215.1, found 215.1.

(2-fluorophenyl)(3-fluorophenyl)methanone (**4e**): Yield 74%; <sup>1</sup>H NMR (400 MHz, DMSO-*d*<sub>6</sub>) δ: 7.74 - 7.69 (m, 1H), 7.66 - 7.54 (m, 5H), 7.43 - 7.39 (m, 2H); <sup>13</sup>C NMR (100 MHz, DMSO-*d*<sub>6</sub>) δ: 192.0, 162.6 (d, *J* = 244.4 Hz), 159.9 (d, *J*<sub>C,F</sub> = 248.4 Hz), 139.5 (d, *J*<sub>C,F</sub> = 6.4 Hz), 134.6 (d, *J*<sub>C,F</sub> = 8.5 Hz), 131.6 (d, *J*<sub>C,F</sub> = 7.8 Hz), 131.1 (d, *J*<sub>C,F</sub> = 2.5 Hz), 126.4 (d, *J*<sub>C,F</sub> = 2.0 Hz), 126.3 (d, *J*<sub>C,F</sub> = 10.6 Hz), 125.4 (d, *J*<sub>C,F</sub> = 3.4 Hz), 121.2 (d, *J*<sub>C,F</sub> = 21.2 Hz), 116.9 (d, *J*<sub>C,F</sub> = 21.2 Hz), 115.8 (d, *J*<sub>C,F</sub> = 22.3 Hz); MS (ESI): *m/z* calcd. for C<sub>13</sub>H<sub>9</sub>F<sub>2</sub>O [M+H]<sup>+</sup> 219.1, found 219.1.

(2-fluorophenyl)(thiophen-2-yl)methanone (**4f**): Yield 73%; <sup>1</sup>H NMR (400 MHz, DMSO-*d*<sub>6</sub>) δ: 8.18 (d, *J* = 4.8 Hz, 1H), 7.70 - 7.63 (m, 2H), 7.60 - 7.59 (m, 1H), 7.45 - 7.37 (m, 2H), 7.28 (t, *J* = 4.4 Hz, 1H); <sup>13</sup>C NMR (100 MHz, DMSO-*d*<sub>6</sub>) δ: 184.9, 159.3 (d, *J*<sub>C,F</sub> = 247.8 Hz), 143.6, 137.4, 136.8, 133.9 (d, *J*<sub>C,F</sub> = 8.3 Hz), 130.4 (d, *J*<sub>C,F</sub> = 2.7 Hz), 129.6, 127.0 (d, *J*<sub>C,F</sub> = 15.2 Hz), 125.2 (d, *J*<sub>C,F</sub> = 3.3 Hz), 116.9 (d, *J*<sub>C,F</sub> = 21.2 Hz); MS (ESI): *m/z* calcd. for C<sub>11</sub>H<sub>8</sub>FOS [M+H]<sup>+</sup> 207.0, found 207.0.

(2,4-dimethoxyphenyl)(2-fluorophenyl)methanone (**4g**): Yield 35%; <sup>1</sup>H NMR (400 MHz, DMSO-*d*<sub>6</sub>) δ: 7.61 - 7.48 (m, 3H), 7.31 - 7.23 (m, 2H), 6.67 - 6.64 (m, 2H), 3.86 (s, 3H), 3.60 (s, 3H); <sup>13</sup>C NMR (100 MHz, DMSO-*d*<sub>6</sub>) δ: 190.5, 164.9, 161.1, 160.1 (d, *J*<sub>C,F</sub> = 248.6 Hz), 133.6 (d, *J*<sub>C,F</sub> = 8.5 Hz), 132.8, 130.4 (d, *J*<sub>C,F</sub> = 2.8 Hz), 129.6 (d, *J*<sub>C,F</sub> = 13.6 Hz), 124.8 (d, *J*<sub>C,F</sub> = 3.4 Hz), 121.5, 116.1 (d, *J*<sub>C,F</sub> = 21.9 Hz), 106.5, 99.1, 56.2, 56.1; MS (ESI): *m/z* calcd. for C<sub>15</sub>H<sub>14</sub>FO<sub>3</sub> [M+H]<sup>+</sup> 261.1, found 261.1.

(4-chlorophenyl)(2-fluorophenyl)methanone (**4h**): Yield 81%; <sup>1</sup>H NMR (400 MHz, DMSO-*d*<sub>6</sub>) δ: 7.79 (d, *J* = 8.4 Hz, 2H), 7.73 - 7.68 (m, 1H), 7.66 (d, *J* = 8.4 Hz, 2H), 7.64 - 7.55 (m, 1H), 7.48 - 7.37 (m, 2H); <sup>13</sup>C NMR (100 MHz, DMSO-*d*<sub>6</sub>) δ: 192.1, 159.7 (d, *J*<sub>C,F</sub> = 248.2 Hz), 139.3, 135.9, 134.4 (d, *J*<sub>C,F</sub> = 8.4 Hz), 131.7, 131.0 (d, *J*<sub>C,F</sub> =

2.7 Hz), 129.5, 126.5(d,  $J_{C,F} = 14.6$  Hz), 125.4(d,  $J_{C,F} = 3.5$ Hz), 116.8(d,  $J_{C,F} = 21.3$ Hz); MS (ESI):  $m/z$  calcd. for  $C_{13}H_9ClFO$   $[M+H]^+$  235.0, found 235.1.

## Reference

1. D. B. G. Williams., and M. Lawton., *J. Org. Chem.*, **2010**, *75* (24), 8351–8354.

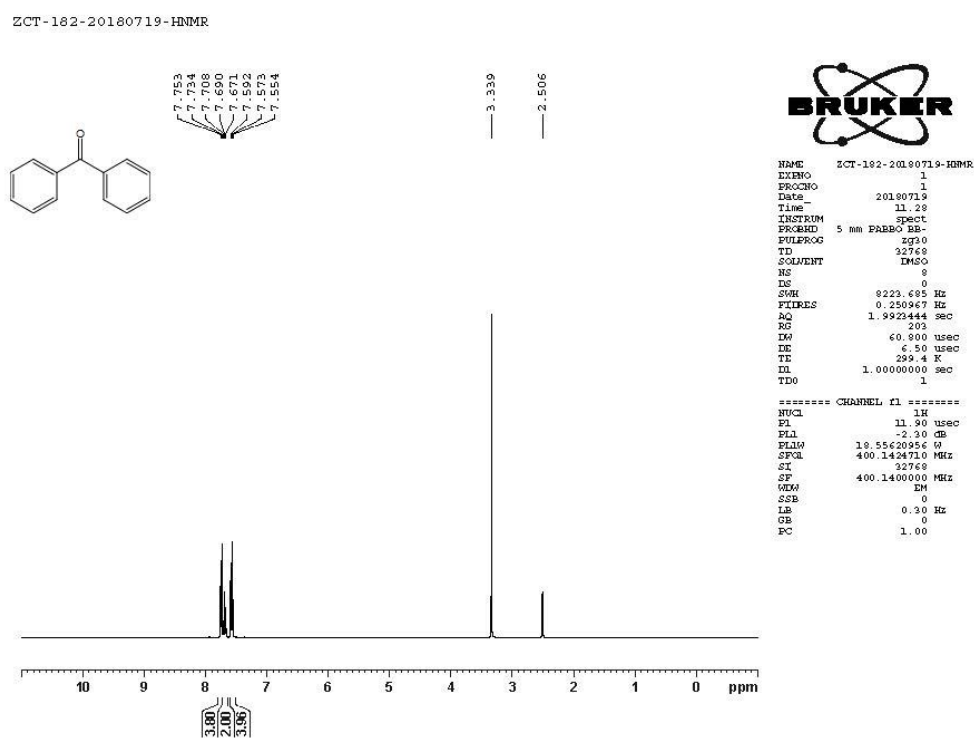

Print of window 80: MS Spectrum  
 Data File : D:\LCMSDATA\SNAPSHOT.D  
 Sample Name : ZCT-182-20180713

Acq. Operator : Location : P1-F-05  
 Injection Date : 13-Jul-18, 11:03:02  
 Acq. Method : GENERAL.M  
 Analysis Method : C:\CHEM32\1\METHODS\PURGE.M  
 Last changed : 7/10/2018 1:23:46 PM  
 (modified after loading)

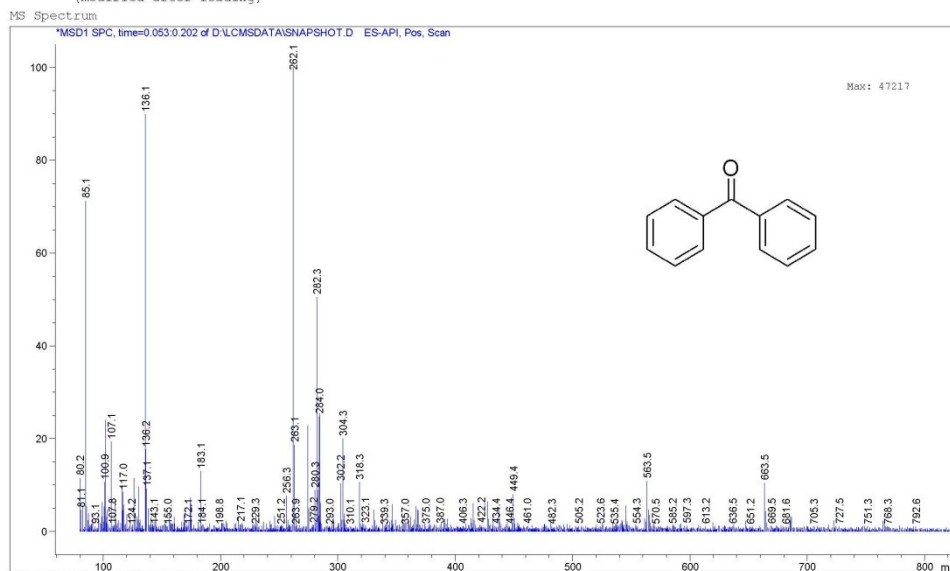

Instrument 1 7/13/2018 11:04:25 AM

Page 1 of 1

ZCT-2a-20171121-HNMR

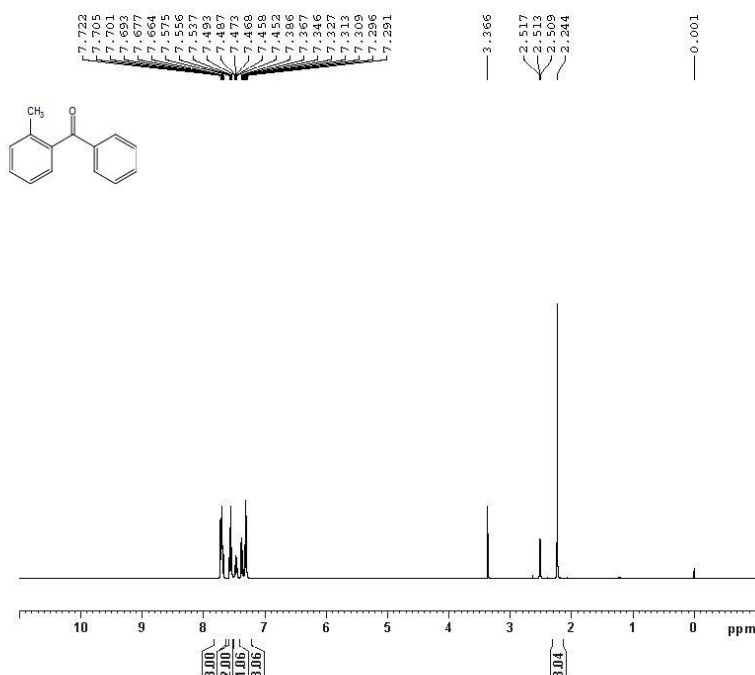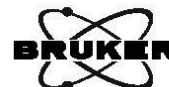

```

NAME      ZCT-2a-20171121-HNMR
EXPNO     1
PROCNO    1
Date_     20171121
Time      15.01
INSTRUM   spect
PROBHD    5 mm PABBO BB-
PULPROG   zg30
TD         32768
SOLVENT   DMSO
NS         8
DS         0
SWH        8223.685 Hz
FIDRES     0.250967 Hz
AQ         1.9923444 sec
RG         203
DM         60.800 usec
DE         6.50 usec
TE         294.0 K
D1         1.00000000 sec
TD0        1

===== CHANNEL f1 =====
NUC1       1H
P1         12.10 usec
PL1        -2.30 dB
PL1W       18.55620956 W
SFO1       400.2324716 MHz
SI         32768
SF         400.2300008 MHz
WDW        EM
SSB        0
LB         0.30 Hz
GB         0
PC         1.00
  
```

ZCT-2a-20180119-CNMR

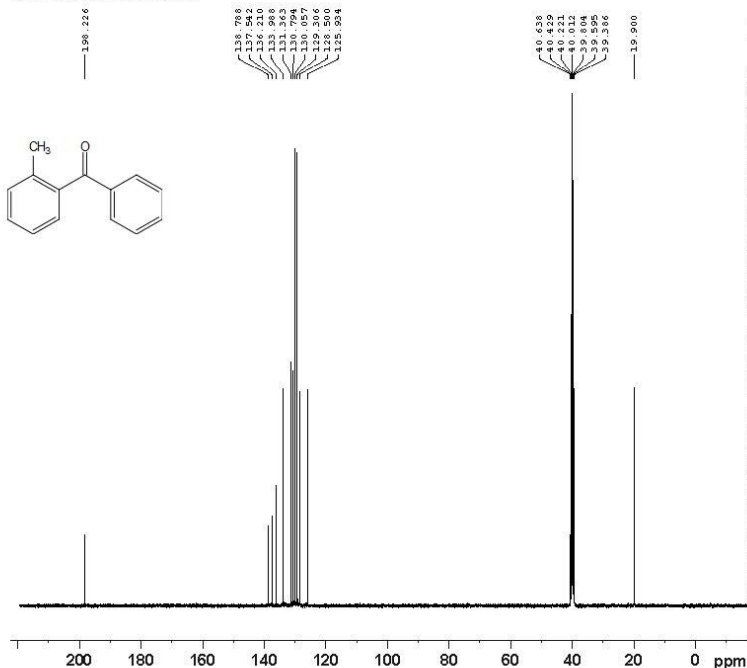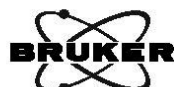

```
NAME ZCT-2a-20180119-CNMR
EXPNO 1
PROCNO 1
Date_ 20180120
Time 9.43
INSTRUM spect
PROBHD 5 mm PABBO BB-
PULPROG zgpg30
TD 65536
SOLVENT DMSO
NS 1024
DS 4
SMH 24038.461 Hz
FIDRES 0.366798 Hz
AQ 1.3631988 sec
RG 203
DM 20.800 usec
DE 6.50 usec
TE 295.1 K
D1 2.0000000 sec
D11 0.0300000 sec
TD0 1

===== CHANNEL f1 =====
NUC1 13C
P1 12.00 usec
PL1 -2.00 dB
PL10 57.72554016 W
SF01 100.6479773 MHz

===== CHANNEL f2 =====
CQPPR2 waltz16
NUC2 1H
PCPD2 80.00 usec
PL2 -2.30 dB
PL12 14.11 dB
PL13 14.11 dB
PL10W 18.55620956 W
PL12W 0.42412052 W
PL13W 0.42412052 W
SF02 400.2116009 MHz
SI 32768
SF 100.6379136 MHz
WDW EM
SSB 0
LB 1.00 Hz
GB 0
PC 1.40
```

Print of window 80: MS Spectrum  
Data File : D:\LCMSDATA\SNAPSHOT.D  
Sample Name : ZCT-2a

Acq. Operator : Location : P1-F-01  
Injection Date : 19-Dec-17, 10:06:54  
Acq. Method : GENERAL.M  
Analysis Method : C:\CHEM32\1\METHODS\222.M  
Last changed : 12/15/2017 11:15:14 AM  
(modified after loading)

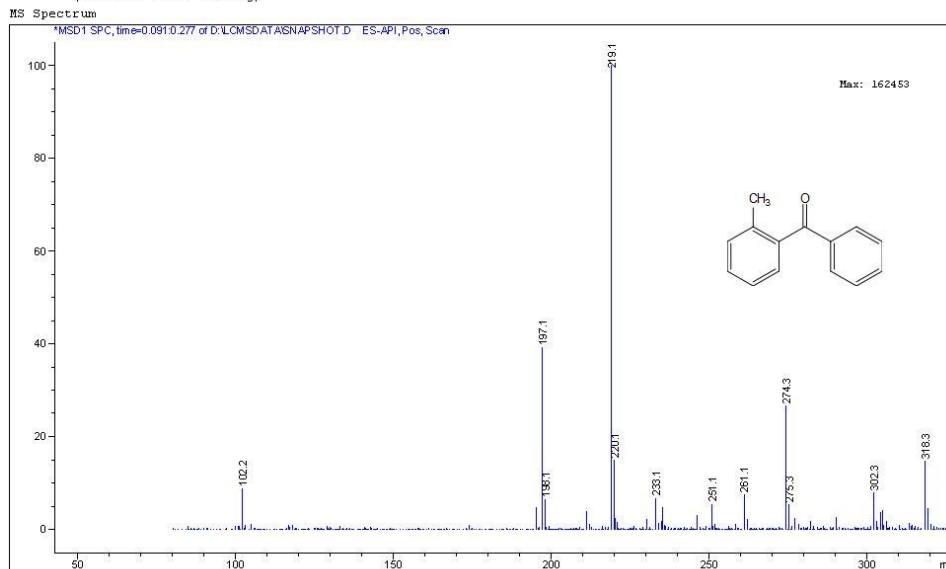

ZCT-2b-20171122-HNMR

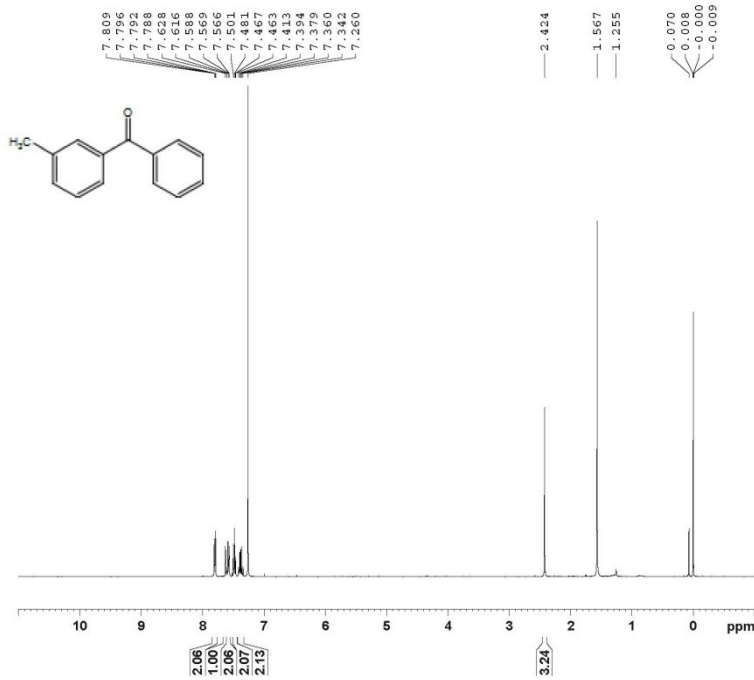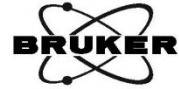

```

NAME      ZCT-2b-20171122-HNMR
EXPNO    1
PROCNO   1
Date_    20171122
Time     11.54
INSTRUM  spect
PROBHD   5 mm PABBO BB
PULPROG  zg30
TD        32768
SOLVENT  CDCl3
NS        8
DS        4
SMH       8223.695 Hz
FIDRES    0.250967 Hz
AQ        1.9923444 sec
RG        203
DW        60.800 usec
DE        6.50 usec
TE        299.5 K
D1        1.00000000 sec
TD0       1

===== CHANNEL f1 =====
NUC1      1H
P1        11.90 usec
PL1       -2.30 dB
PL1W      18.55620956 W
SFO1      400.1424710 MHz
SI        32768
SF        400.1400091 MHz
WDW       EM
SSB       0
LB        0.30 Hz
GB        0
PC        1.00
    
```

ZCT-2b-20180720-CNMR

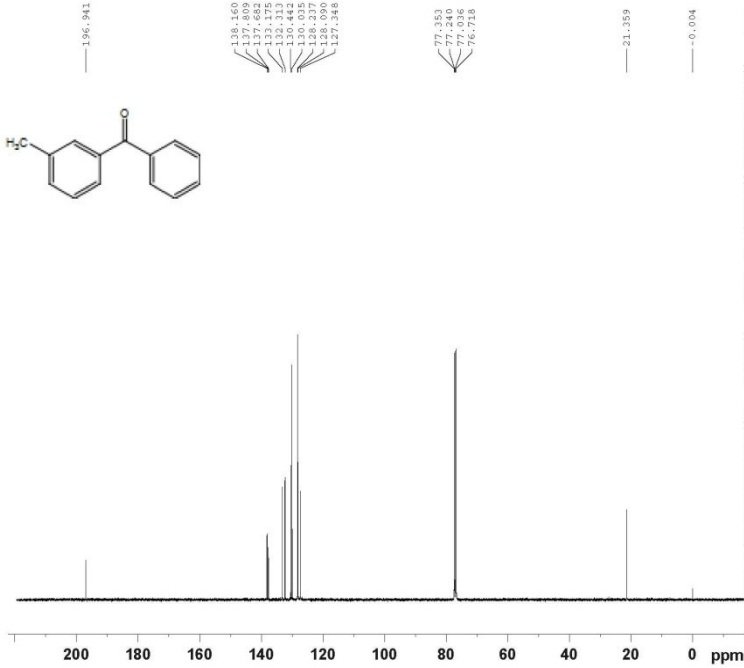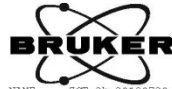

```

NAME      ZCT-2b-20180720-CNMR
EXPNO    1
PROCNO   1
Date_    20180721
Time     1.59
INSTRUM  spect
PROBHD   5 mm PABBO BB
PULPROG  zgpg30
TD        65536
SOLVENT  CDCl3
NS        4
DS        4
SMH       24038.461 Hz
FIDRES    0.366798 Hz
AQ        1.3631988 sec
RG        203
DW        20.800 usec
DE        6.50 usec
TE        301.3 K
D1        2.00000000 sec
D11       0.03000000 sec
TD0       1

===== CHANNEL f1 =====
NUC1      13C
P1        11.20 usec
PL1       -2.00 dB
PL1W      57.72554016 W
SFO1      100.6253446 MHz

===== CHANNEL f2 =====
CPDRES2   wal1216
NUC2      1H
PCPD2     80.00 usec
PL2       -2.30 dB
PL12      14.25 dB
PL13      14.11 dB
PL1W      18.55620956 W
PL12W     0.41066650 W
PL13W     0.42412052 W
SFO2      400.1416006 MHz
SI        32768
SF        100.6152829 MHz
WDW       EM
SSB       0
LB        1.00 Hz
GB        0
PC        1.40
    
```

Print of window 80: MS Spectrum  
 Data File : D:\LCMSDATA\SNAPSHOT.D  
 Sample Name : ZCT-2b

Acq. Operator : Location : P1-F-01  
 Injection Date : 19-Dec-17, 10:11:34  
 Acq. Method : GENERAL.M  
 Analysis Method : C:\CHEM32\1\METHODS\222.M  
 Last changed : 12/15/2017 11:15:14 AM  
 (modified after loading)

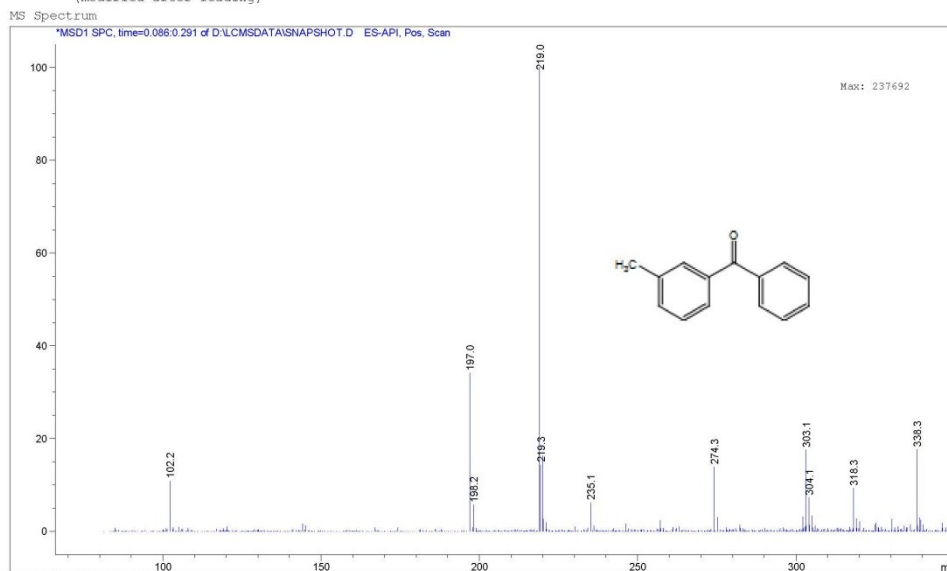

ZCT-2c-20171122-HNMR

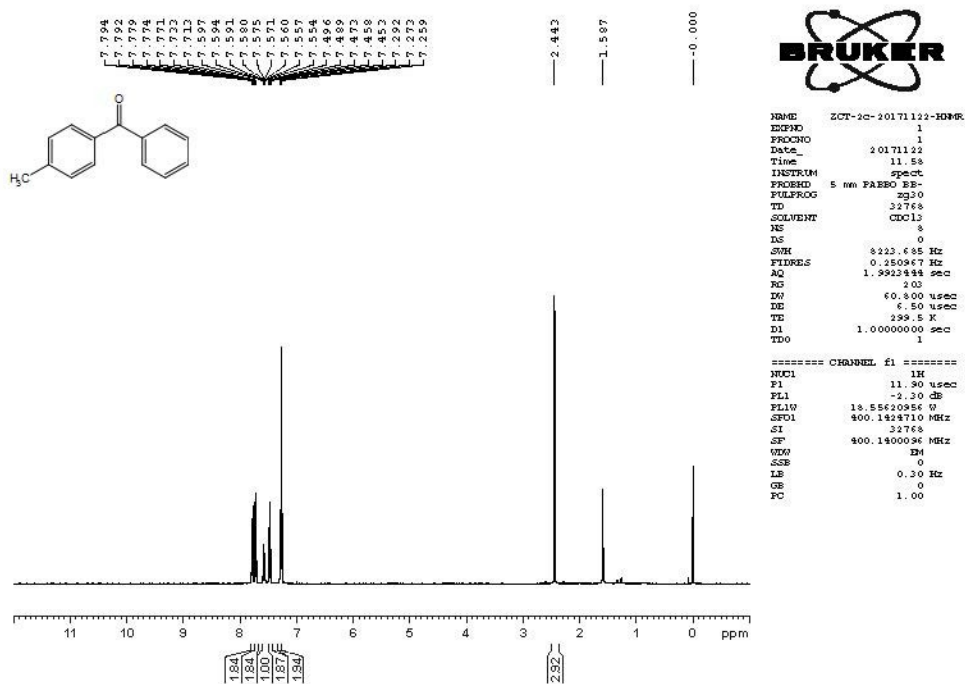

ZCT-2c-20180316-CNMR

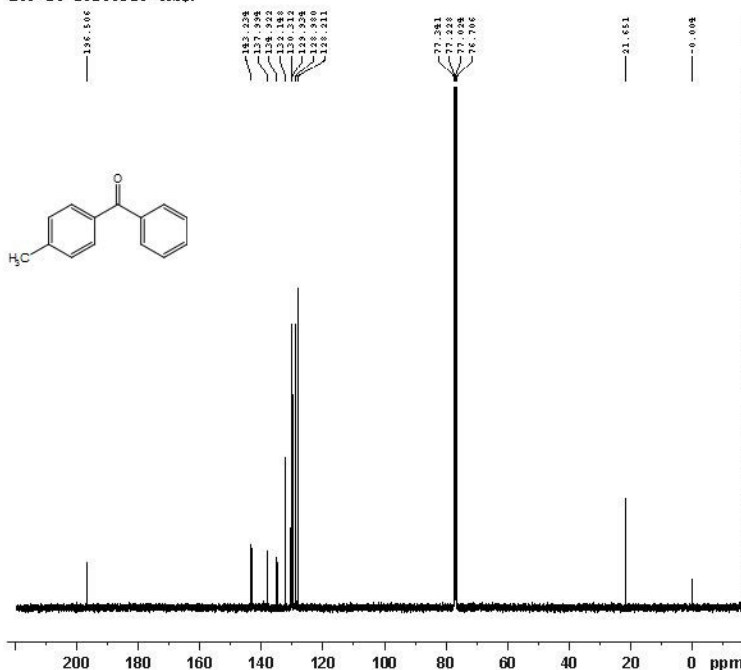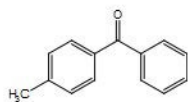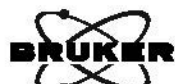

```

NAME      ZCT-2c-20180316-CNMR
EXPNO     1
PROCNO    1
Date_     20180316
Time      23.20
INSTRUM   spect
PROBHD    5 mm F4BBO BB-
PULPROG   zgpg30
TD         65536
SOLVENT   CDCl3
NS         1024
DS         4
SMK       24038.461 KHz
FIDRES    0.266798 KHz
AQ         1.3621888 sec
RG         203
DQ         20.800 usec
SI         6.50 usec
TE         296.6 K
D1         2.00000000 sec
D11        0.03000000 sec
TD0        1

===== CHANNEL f1 =====
NUC1       13C
P1         11.20 usec
PL1        -2.00 dB
PL10       57.72558016 V
SFO1       100.6253446 MHz

===== CHANNEL f2 =====
CPDPRG2   waltz16
NUC2       1H
PCPD2     80.00 usec
PL2        -2.30 dB
PL12       18.25 dB
PL13       18.11 dB
PL10       18.55620884 V
PL140      0.81066650 V
PL130      0.82412052 V
SFO2       400.1416004 MHz
SI         32768
SF         100.6152826 MHz
NS0        24
SSB        0
LB         1.00 KHz
GB         0
PC         1.40
    
```

Print of window 80: MS Spectrum  
 Data File : D:\LCMSDATA\SNAPSHOT.D  
 Sample Name : ZCT-2c

=====  
 Acq. Operator : Location : P1-P-01  
 Injection Date : 19-Dec-17, 10:14:40  
 Acq. Method : GENERAL.M  
 Analysis Method : C:\CHEM32\1\METHODS\222.M  
 Last changed : 12/15/2017 11:15:14 AM  
 (modified after loading)

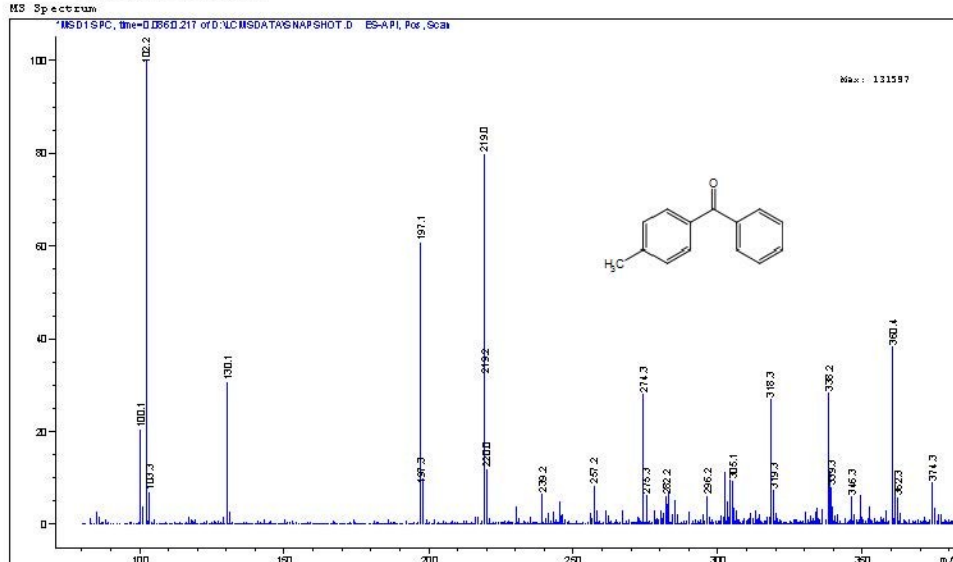



ZCT-2d-20171124-HNMR

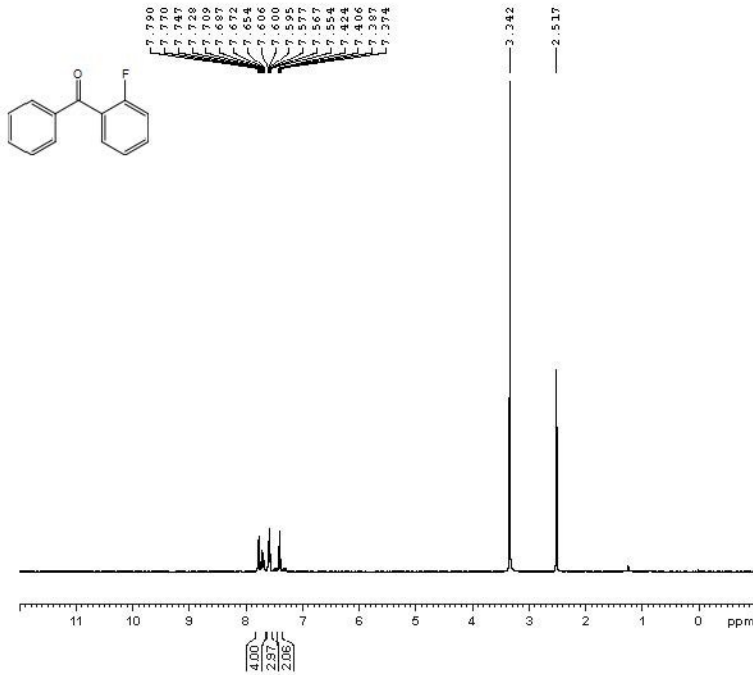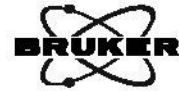

```

NAME      ZCT-2d-20171124-HNMR
EXPNO    1
PROCNO   1
Date_    20171124
Time     11.35
INSTRUM  spect
PROBHD   5 mm PABBO BB-
PULPROG  zgpg30
TD        32768
SOLVENT  DMSO
NS        8
DS        0
SMH      322.685 Hz
FIDRES   0.250967 Hz
AQ        1.992888 sec
RG        203
DW        60.800 usec
DE        6.50 usec
TE        299.5 K
D1        1.0000000 sec
TD0       1

===== CHANNEL f1 =====
NUC1      1H
P1        11.90 usec
PL1       -2.30 dB
PL1W     18.55620956 W
SFO1     400.1418710 MHz
SI        32768
SF        400.1399856 MHz
WDW       EM
SSB       0
LB        0.30 Hz
GB        0
PC        1.00
    
```

ZCT-2d-20180119-CNMR

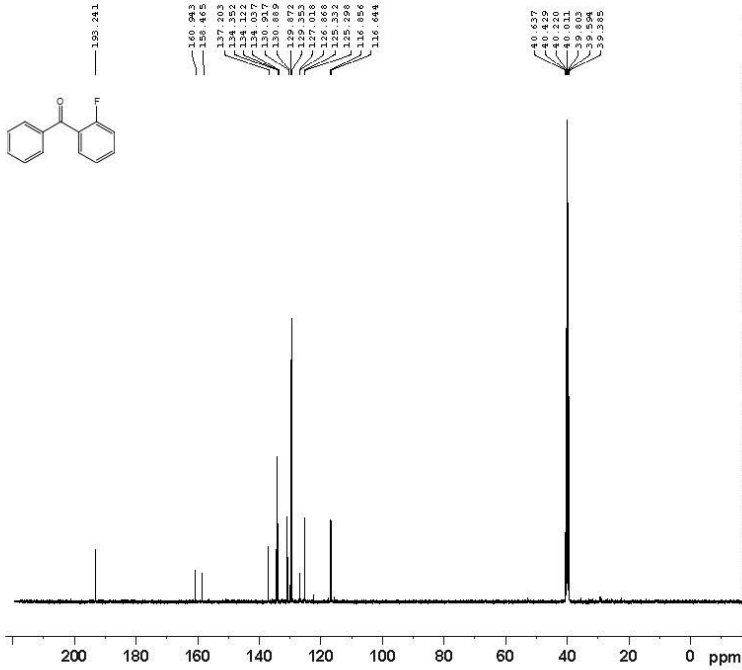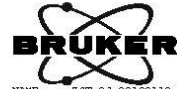

```

NAME      ZCT-2d-20180119-CNMR
EXPNO    1
PROCNO   1
Date_    20180120
Time     5.48
INSTRUM  spect
PROBHD   5 mm PABBO BB-
PULPROG  zgpg30
TD        65536
SOLVENT  DMSO
NS        1024
DS        4
SMH      24038.461 Hz
FIDRES   0.366798 Hz
AQ        1.3631988 sec
RG        203
DW        20.800 usec
DE        6.50 usec
TE        295.3 K
D1        2.0000000 sec
D11       0.0300000 sec
TD0       1

===== CHANNEL f1 =====
NUC1      13C
P1        12.00 usec
PL1       -2.00 dB
PL1W     57.72554016 W
SFO1     100.6479773 MHz

===== CHANNEL f2 =====
CPDPRG2  waltz16
NUC2      1H
PCPD2    80.00 usec
PL2       -2.30 dB
PL12     14.11 dB
PL13     14.11 dB
PL2W     18.55620956 W
PL12W    0.42412052 W
PL13W    0.42412052 W
SFO2     400.2316009 MHz
SI        32768
SF        100.6379129 MHz
WDW       EM
SSB       0
LB        1.00 Hz
GB        0
PC        1.40
    
```

Print of window 80: MS Spectrum  
 Data File : D:\LCMSDATA\SNAPSHOT.D  
 Sample Name : ZCT-2d

Acq. Operator : Location : P1-F-01  
 Injection Date : 19-Dec-17, 10:17:30  
 Acq. Method : GENERAL.M  
 Analysis Method : C:\CHEM32\1\METHODS\222.M  
 Last changed : 12/15/2017 11:15:14 AM  
 (modified after loading)

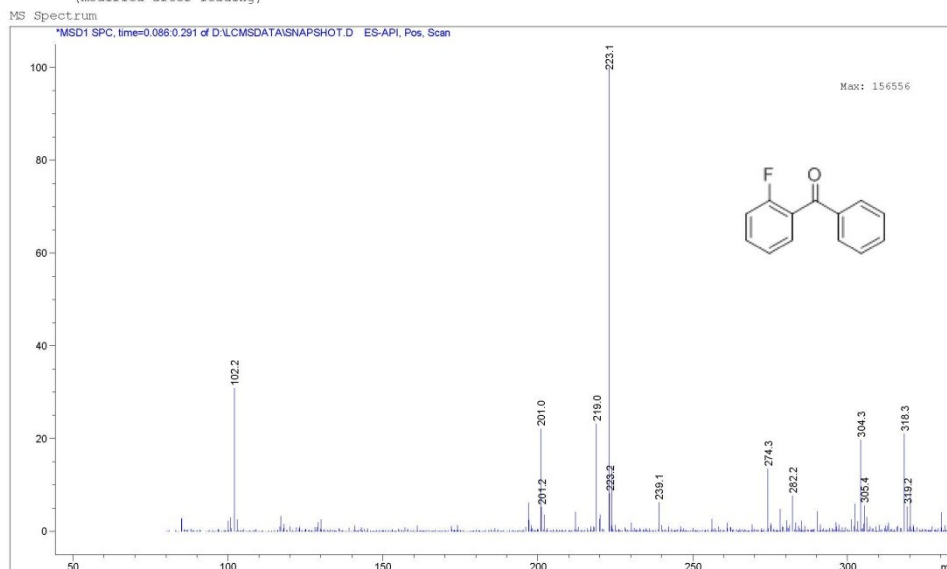

Instrument 1 12/19/2017 10:19:35 AM

Page 1 of 1

ZCT-2e-20171122-HNMR

7.7809  
7.7792  
7.7789  
7.7691  
7.7681  
7.7612  
7.7597  
7.7594  
7.7589  
7.7585  
7.7564  
7.7538  
7.7490  
7.7483  
7.7479  
7.7469  
7.7455  
7.7449  
7.7439  
7.7396  
7.7314  
7.7310  
7.7308  
7.7296  
7.7284  
7.7289  
7.7286  
7.7273  
7.7261

1.5695  
1.2855  
1.2355

0.072  
0.008  
-0.000

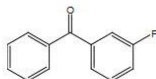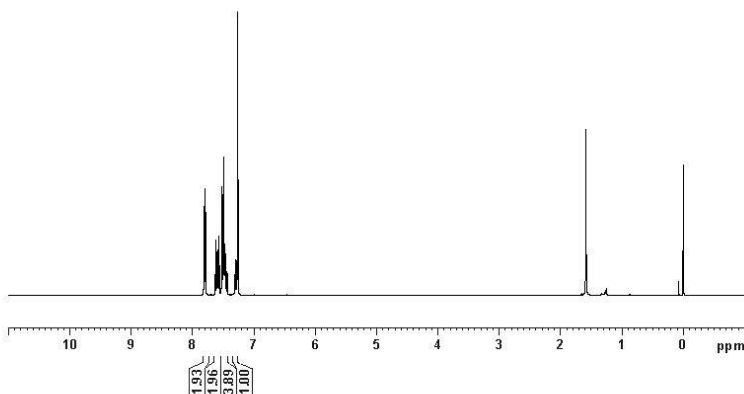

NAME ZCT-2e-20171122-HNMR  
 EXPNO 1  
 PROCNO 1  
 Date\_ 20171122  
 Time 12.02  
 INSTRUM spect  
 PROBRD 5 mm PABBO BB-  
 PULPROG zg30  
 TD 32768  
 SOLVENT CDCl3  
 NS 8  
 DS 0  
 SWH 8223.685 Hz  
 FIDRES 0.250967 Hz  
 AQ 1.9923444 sec  
 RG 203  
 DW 60.800 usec  
 DE 6.50 usec  
 TE 299.6 K  
 DI 1.0000000 sec  
 TDO 1

\*\*\*\*\* CHANNEL f1 \*\*\*\*\*  
 NUCl 1H  
 P1 11.90 usec  
 PL1 -2.30 dB  
 F1F1W 18.55620956 MHz  
 SFO1 400.1424710 MHz  
 SI 32768  
 SF 400.1400090 MHz  
 WDW EM  
 SSB 0  
 LB 0.30 Hz  
 GB 0  
 PC 1.00

ZCT-2e-20180318-CNMR

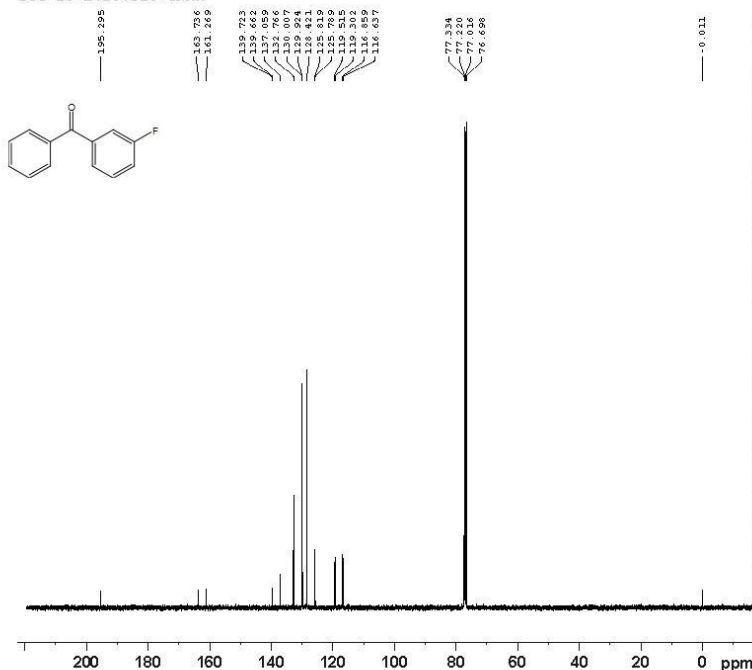

```

NAME      ZCT-2e-20180318-CNMR
EXPNO    1
PROCNO   1
Date_    20180318
Time     21.22
INSTRUM  spect
PROBHD   5 mm PABBO BB-
PULPROG  zgpg30
TD        65536
SOLVENT  CDCl3
NS        1024
DS        4
SMH      24038.461 Hz
FIDRES   0.366798 Hz
AQ        1.3631988 sec
RG        203
DW        20.800 usec
DE        6.50 usec
TE        296.0 K
D1        2.0000000 sec
D11       0.0300000 sec
TD0       1

===== CHANNEL f1 =====
NUC1      13C
P1        11.20 usec
PL1       -2.00 dB
PL10      57.72554016 W
SF01      100.6253446 MHz

===== CHANNEL f2 =====
CQPPR2    waltz16
NUC2      1H
PCPD2     80.00 usec
PL2       -2.30 dB
PL12      14.25 dB
PL13      14.11 dB
PL10W     18.55620856 W
PL12W     0.41066650 W
PL13W     0.42412052 W
SF02      400.1416006 MHz
SI        32768
SF        100.6152824 MHz
WDW       EM
SSB       0
LB        1.00 Hz
GB        0
PC        1.40

```

Print of window 80: MS Spectrum  
 Data File : D:\LCMSDATA\SNAPSHOT.D  
 Sample Name : ZCT-2e

Acq. Operator : Location : P1-F-01  
 Injection Date : 19-Dec-17, 10:20:57  
 Acq. Method : GENERAL.M  
 Analysis Method : C:\CHEM32\1\METHODS\222.M  
 Last changed : 12/15/2017 11:15:14 AM  
 (modified after loading)

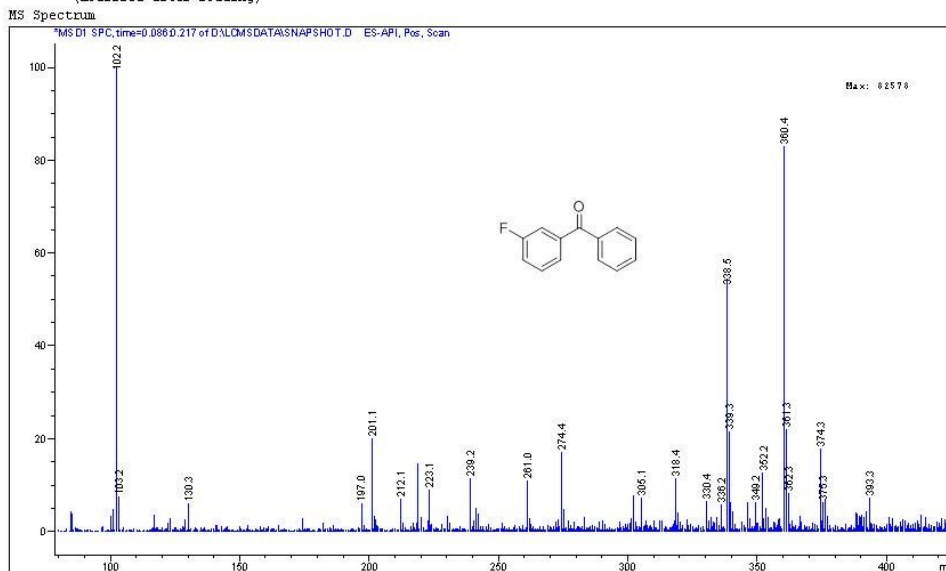

ZCT-2f-20180306-HNMR

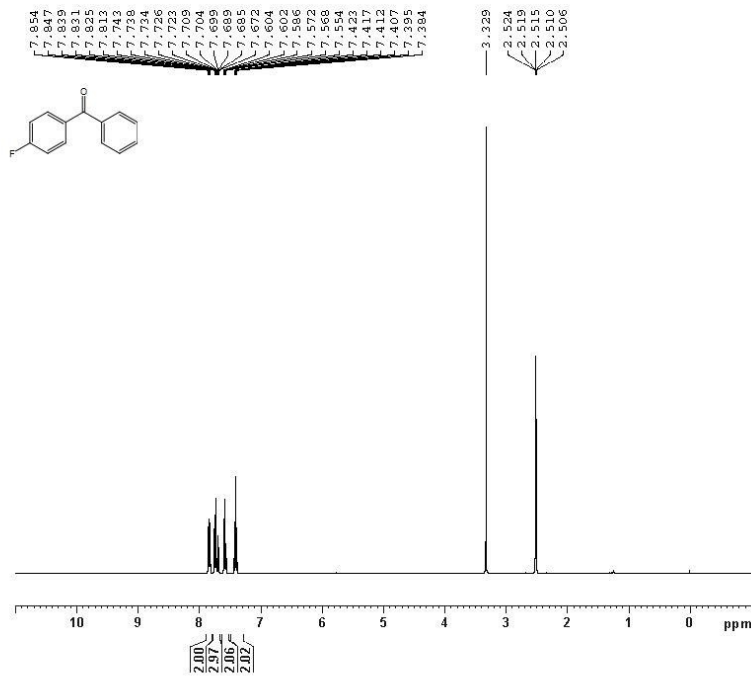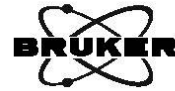

```

NAME      ZCT-2f-20180306-HNMR
EXPNO    1
PROCNO   1
Date_    20180306
Time     13.53
INSTRUM  spect
PROBHD   5 mm PABBO BSV
PULPROG  zg30
TD       32768
SOLVENT  DMSO
NS       8
DS       0
SMH      8012.820 Hz
FIDRES   0.244532 Hz
AQ        2.0447731 sec
RG        203
DW        62.400 usec
DE         6.50 usec
TE        298.1 K
D1        1.0000000 sec
TDO       1

===== CHANNEL f1 =====
SFO1     400.1424710 MHz
NUC1     1H
P1        13.35 usec
SI        65536
SF        400.1399968 MHz
WDW       EM
SSB       0
LB        0.30 Hz
GB        0
PC        1.00
    
```

ZCT-2f-20180308-CNMR

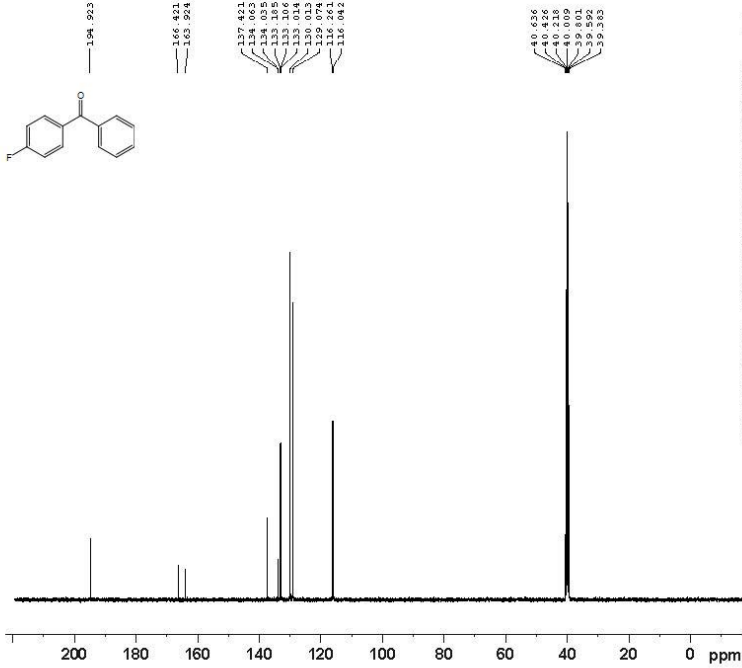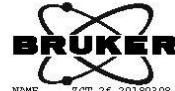

```

NAME      ZCT-2f-20180308-CNMR
EXPNO    1
PROCNO   1
Date_    20180308
Time     16.09
INSTRUM  spect
PROBHD   5 mm PABBO BB/
PULPROG  zgpg30
TD       65536
SOLVENT  DMSO
NS       4
DS       4
SMH      24038.461 Hz
FIDRES   0.366798 Hz
AQ        1.3631988 sec
RG        203
DW        20.800 usec
DE         6.50 usec
TE        295.1 K
D1        2.0000000 sec
D11       0.0300000 sec
TDO       1

===== CHANNEL f1 =====
SFO1     100.6253441 MHz
NUC1     13C
P1        11.00 usec
SI        32768
SF        100.6152813 MHz
WDW       EM
SSB       0
LB        1.00 Hz
GB        0
PC        1.40
    
```

Print of window 80: MS Spectrum  
 Data File : D:\LCMSDATA\SNAPSHOT.D  
 Sample Name : ZCT-2f

=====  
 Acq. Operator : Location : P1-F-01  
 Injection Date : 19-Dec-17, 10:24:15  
 Acq. Method : GENERAL.M  
 Analysis Method : C:\CHEM32\1\METHODS\222.M  
 Last changed : 12/15/2017 11:15:14 AM  
 (modified after loading)

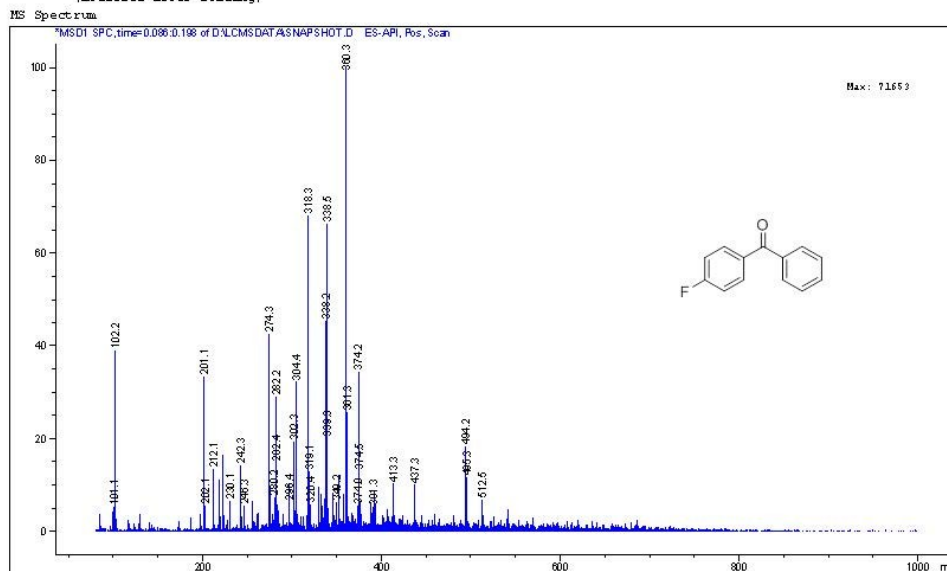

Instrument 1 12/19/2017 10:25:48 AM

Page 1 of 1

ZCT-2h-20171213-HNMR

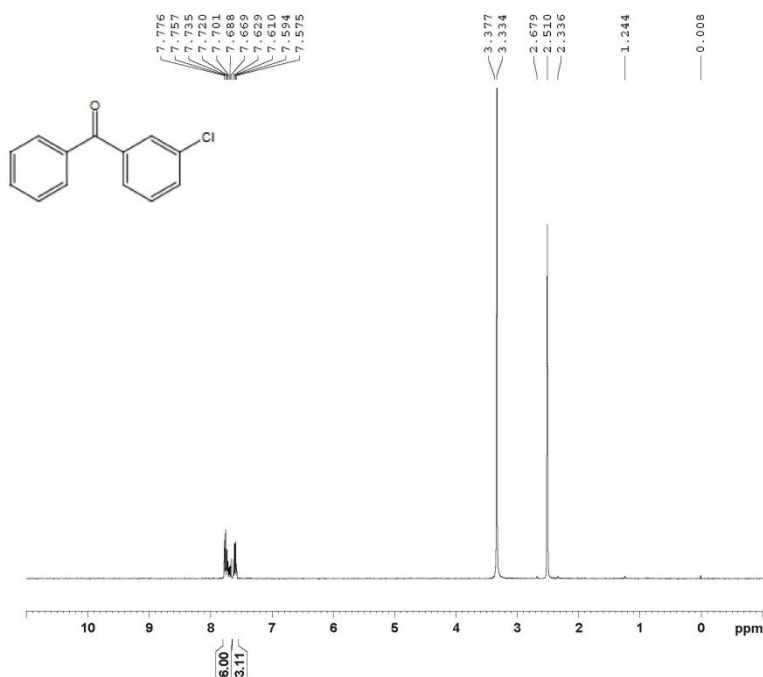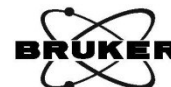

|         |                      |
|---------|----------------------|
| NAME    | ZCT-2h-20171213-HNMR |
| EXPNO   | 1                    |
| PROCNO  | 1                    |
| Date_   | 20171213             |
| Time    | 11.43                |
| INSTRUM | spect                |
| FROBHD  | 5 mm PABBO BB-       |
| PULPROG | zg30                 |
| TD      | 32768                |
| SOLVENT | DMSO                 |
| NS      | 8                    |
| DS      | 0                    |
| SWH     | 8223.685 Hz          |
| FIDRES  | 0.250967 Hz          |
| AQ      | 1.9923444 sec        |
| RG      | 203                  |
| DW      | 60.880 usec          |
| DE      | 6.50 usec            |
| TE      | 299.4 K              |
| D1      | 1.0000000 sec        |
| TD0     | 1                    |

----- CHANNEL f1 -----

|      |                 |
|------|-----------------|
| NUC1 | 1H              |
| P1   | 11.90 usec      |
| PL1  | -2.30 dB        |
| PL1W | 18.55620956 W   |
| SFO1 | 400.1424710 MHz |
| SI   | 32768           |
| SF   | 400.1399993 MHz |
| MEW  | EM              |
| SSB  | 0               |
| LB   | 0.30 Hz         |
| GB   | 0               |
| PC   | 1.00            |

ZCT-2h-20180119-CNMR

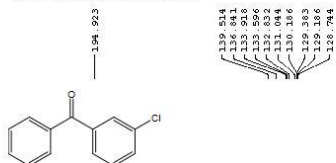

40.436  
40.428  
40.219  
39.602  
39.593  
39.585

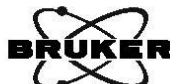

```

NAME      ZCT-2h-20180119-CNMR
EXPNO     1
PROCNO    1
Date_     20180120
Time      9.56
INSTRUM   spect
PROBHD    5 mm PABBO BB-
PULPROG   zgpg30
TD         65536
SOLVENT   DMSO
NS         1024
DS         4
SMH       24038.461 Hz
FIDRES    0.366798 Hz
AQ         1.3631988 sec
RG         203
DM         20.800 usec
DE         6.50 usec
TE         295.3 K
D1         2.0000000 sec
D11        0.0300000 sec
TD0        1
  
```

```

===== CHANNEL f1 =====
NUC1      13C
P1        12.00 usec
PL1       -2.00 dB
PL10      57.72554016 W
SF01      100.64789773 MHz
  
```

```

===== CHANNEL f2 =====
CQPPR2    waltz16
NUC2      1H
PCPD2     80.00 usec
PL2       -2.30 dB
PL12      14.11 dB
PL13      14.11 dB
PL10W     18.55620856 W
PL12W     0.42412052 W
PL13W     0.42412052 W
SFO2      400.2316009 MHz
SI         32768
SF         100.6378132 MHz
WDW        EM
SSB        0
LB         1.00 Hz
GB         0
PC         1.40
  
```

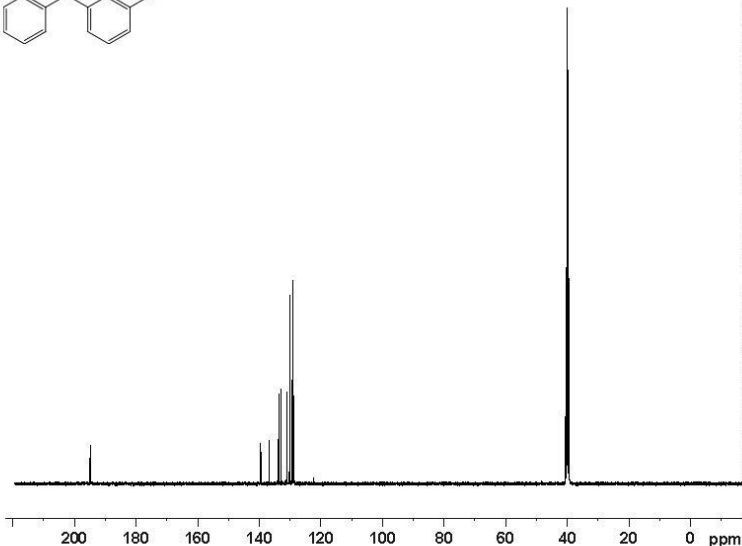

Print of window 80: MS Spectrum  
 Data File : D:\LCMSDATA\SNAPSHOT.D  
 Sample Name : ZCT-2h

=====  
 Acq. Operator : Location : P1-F-01  
 Injection Date : 19-Dec-17, 10:27:15  
 Acq. Method : GENERAL.M  
 Analysis Method : C:\CHEM32\1\METHODS\222.M  
 Last changed : 12/15/2017 11:15:14 AM  
 (modified after loading)

MS Spectrum

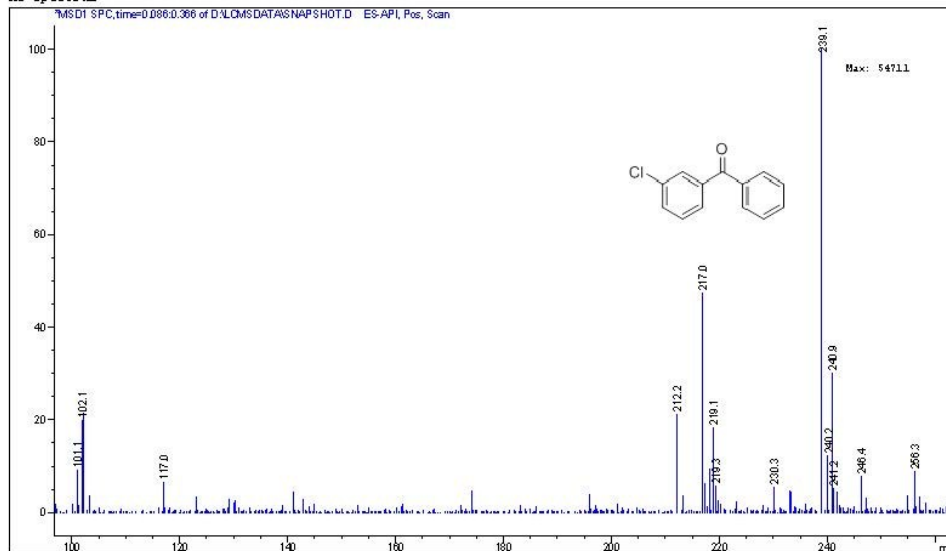



Print of window 80: MS Spectrum  
 Data File : D:\LCMSDATA\SNAPSHOT.D  
 Sample Name : ZCT-2j

-----  
 Acq. Operator : Location : P1-F-01  
 Injection Date : 19-Dec-17, 10:30:15  
 Acq. Method : GENERAL.M  
 Analysis Method : C:\CHEM32\1\METHODS\222.M  
 Last changed : 12/15/2017 11:15:14 AM  
 (modified after loading)

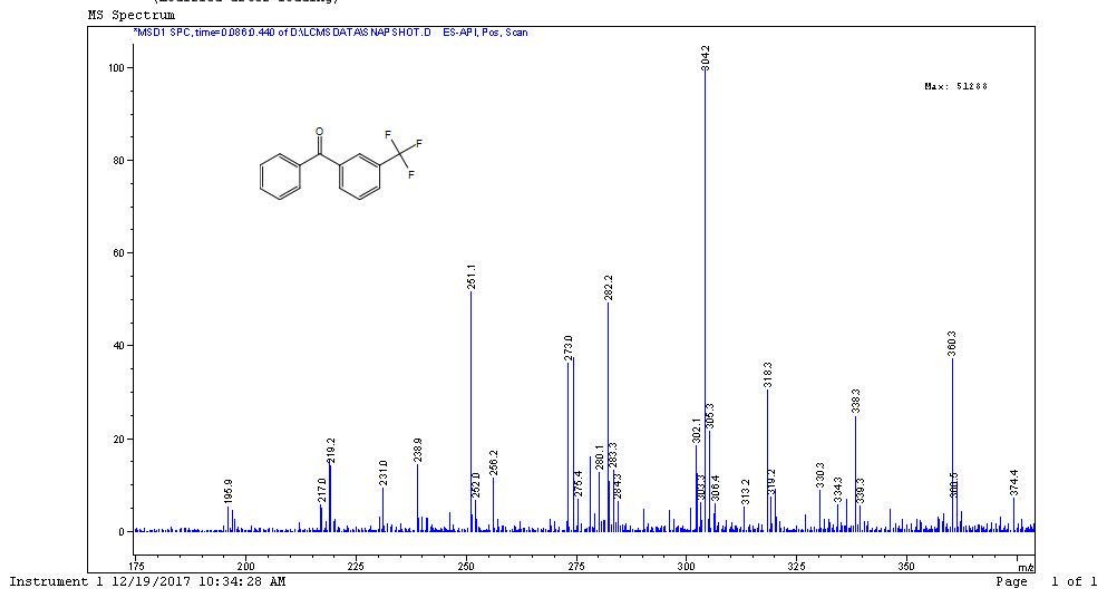

ZCT-2k-20171122-HNMR

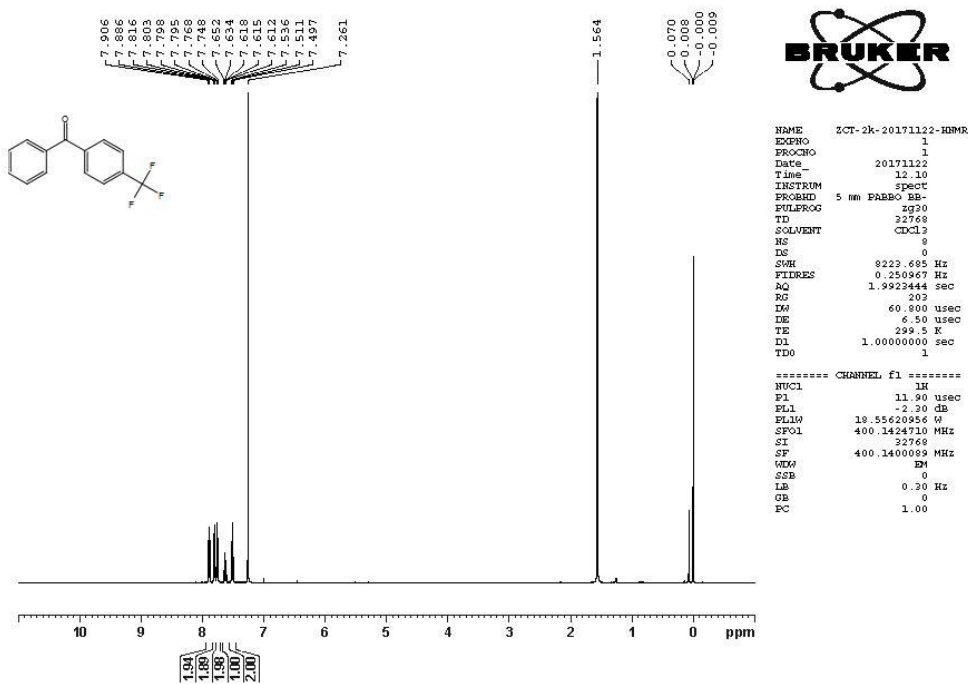





ZCT-2m-20171122-HNMR

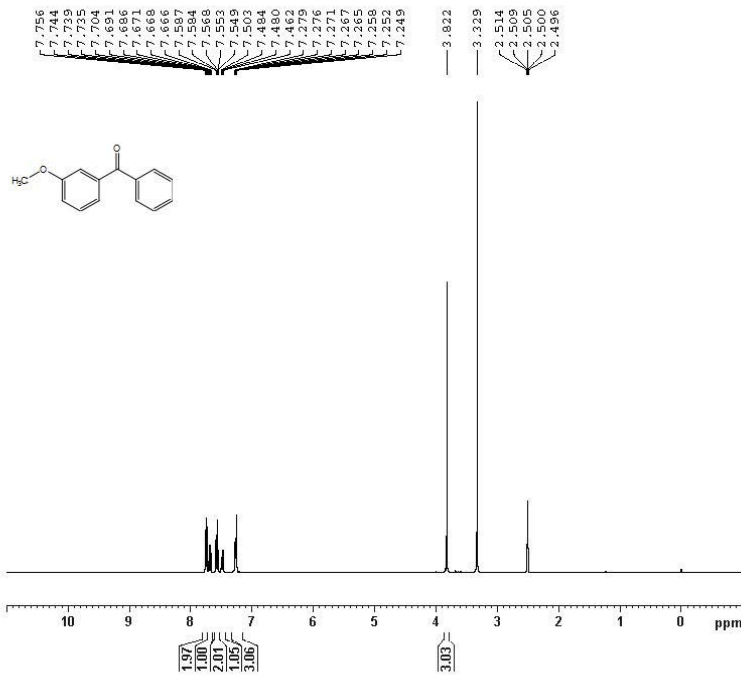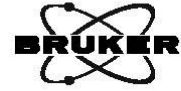

```

NAME      ZCT-2m-20171122-HNMR
EXPNO     1
PROCNO    1
Date_     20171122
Time      12.22
INSTRUM   spect
PROBHD    5 mm PABBO ES-
PULPROG   zg30
TD         32768
SOLVENT   DMSO
NS         8
DS         0
SWH        8223.685 Hz
FIDREC     0.250867 Hz
AQ         1.9923444 sec
RG         203
DM         60.800 usec
DE         6.50 usec
TE         299.6 K
D1         1.0000000 sec
TD0        1

===== CHANNEL f1 =====
NUC1      1H
P1        11.90 usec
PL1       -2.30 dB
PL1W      18.55620956 W
SFO1      400.1424710 MHz
SI         32768
SF         400.1400007 MHz
WDW        EM
SSB        0
LB         0.30 Hz
GB         0
PC         1.00
    
```

ZCT-2m-20180119-CNMR

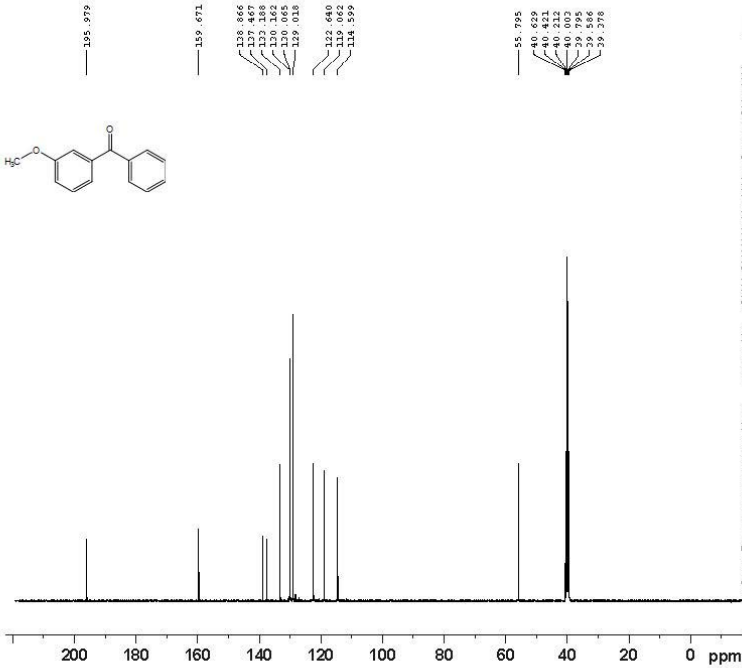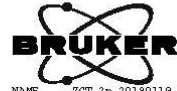

```

NAME      ZCT-2m-20180119-CNMR
EXPNO     1
PROCNO    1
Date_     20180120
Time      13.12
INSTRUM   spect
PROBHD    5 mm PABBO BB-
PULPROG   zgpg30
TD         65536
SOLVENT   DMSO
NS         1024
DS         4
SWH        2408.461 Hz
FIDREC     0.366798 Hz
AQ         1.3631988 sec
RG         203
DM         20.800 usec
DE         6.50 usec
TE         296.2 K
D1         2.0000000 sec
D11        0.0300000 sec
TD0        1

===== CHANNEL f1 =====
NUC1      13C
P1        12.00 usec
PL1       -2.00 dB
PL1W      57.72554016 W
SFO1      100.6279773 MHz

===== CHANNEL f2 =====
CPDPRG2   waltz16
NUC2      1H
PCPD2     80.00 usec
PL2       -2.30 dB
PL12      14.11 dB
PL13      14.11 dB
PL1W      18.55620956 W
PL12W     0.42412052 W
PL13W     0.42412052 W
SFO2      400.2316009 MHz
SI         32768
SF         100.6279140 MHz
WDW        EM
SSB        0
LB         1.00 Hz
GB         0
PC         1.40
    
```

Print of window 80: MS Spectrum  
 Data File : D:\LCMSDATA\SNAPSHOT.D  
 Sample Name : ZCT-2n

Acq. Operator : Location : P1-F-01  
 Injection Date : 19-Dec-17, 10:39:22  
 Acq. Method : GENERAL.M  
 Analysis Method : C:\CHEM32\1\METHODS\222.M  
 Last changed : 12/15/2017 11:15:14 AM  
 (modified after loading)

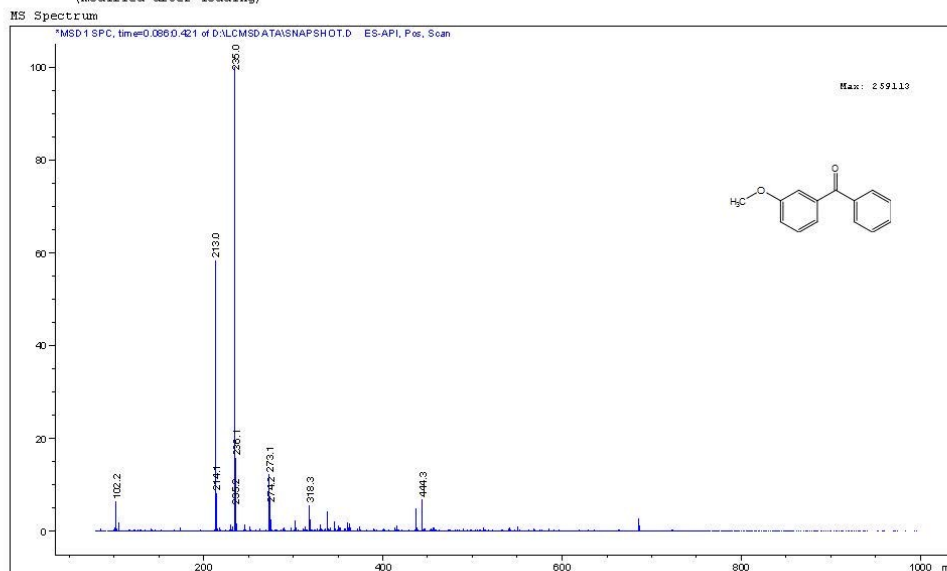

Instrument 1 12/19/2017 10:41:24 AM Page 1 of 1

ZCT-2n-20180306-HNMR

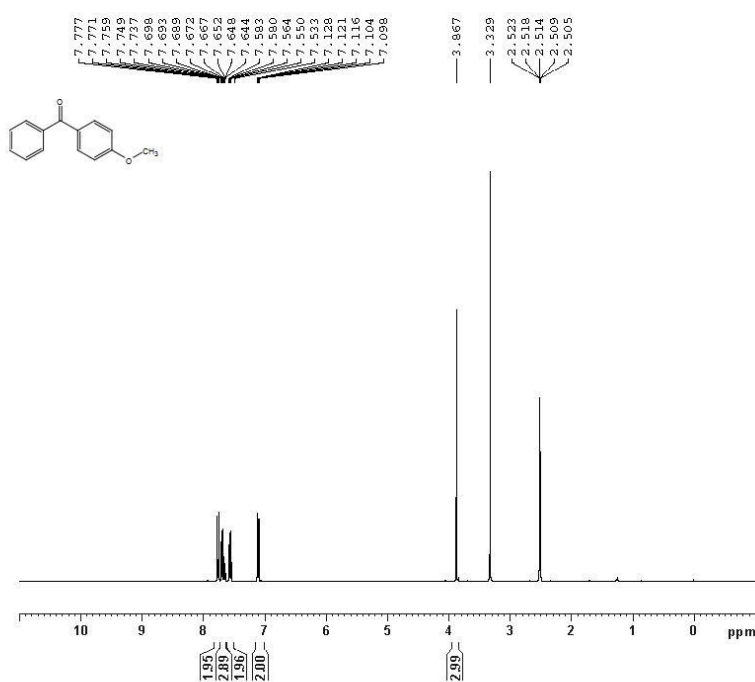

NAME ZCT-2n-20180306-HNMR  
 EXPNO 1  
 PROCNO 1  
 Date\_ 20180306  
 Time 13.56  
 INSTRUM spect  
 PROBE 5 mm PABBO BB/  
 PULPROG zg30  
 TD 32768  
 SOLVENT DMSO  
 NS 8  
 DS 0  
 SWH 8012.820 Hz  
 FIDRES 0.244532 Hz  
 AQ 2.0447731 sec  
 RG 203  
 DW 62.400 usec  
 DE 6.50 usec  
 TE 298.1 K  
 DI 1.0000000 sec  
 TDO 1

==== CHANNEL f1 =====  
 SFO1 400.1424710 MHz  
 NUC1 1H  
 P1 13.35 usec  
 SI 65536  
 SF 400.1399971 MHz  
 WDW EM  
 SSB 0  
 LB 0.30 Hz  
 GB 0  
 PC 1.00

ZCT-2n-20180308-CNMR

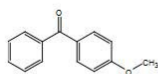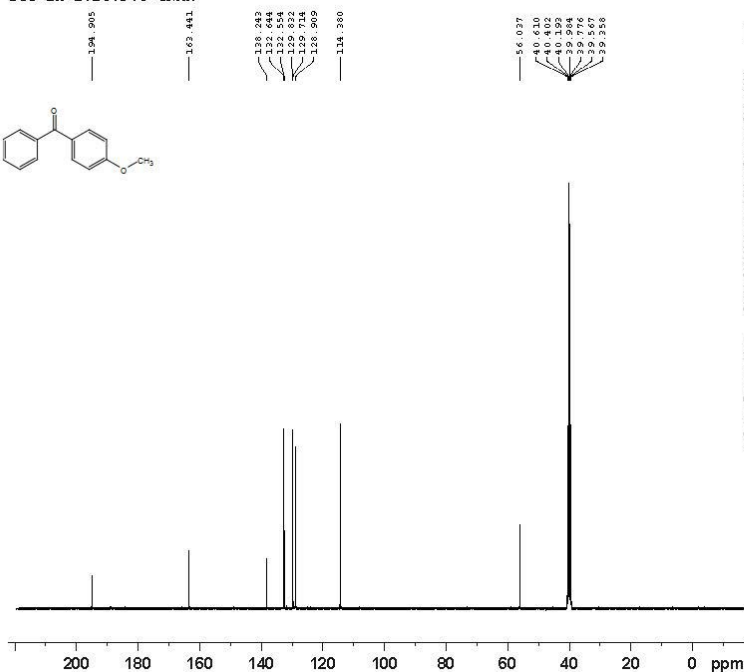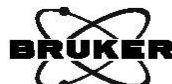

NAME ZCT-2n-20180308-CNMR  
 EXPNO 1  
 PROCNO 1  
 Date\_ 20180309  
 Time 5.15  
 INSTRUM spect  
 PROBEID 5 mm F4BBO BB/  
 PULPROG zgpg30  
 TD 65536  
 SOLVENT DMSO  
 NS 1024  
 DS 4  
 SWH 24038.461 Hz  
 FIDRES 0.366798 Hz  
 AQ 1.3631998 sec  
 RG 203  
 DW 20.800 usec  
 DE 6.50 usec  
 TE 295.0 K  
 D1 2.0000000 sec  
 D11 0.0300000 sec  
 TDO 1

\*\*\*\*\* CHANNEL f1 \*\*\*\*\*  
 SF01 100.6253441 MHz  
 NUC1 13C  
 P1 11.00 usec  
 SI 32768  
 SF 100.6152835 MHz  
 WDW EM  
 SSB 0  
 LB 1.00 Hz  
 GB 0  
 PC 1.40

Print of window 80: MS Spectrum  
 Data File : D:\LCMSDATA\SNAPSHOT.D  
 Sample Name : ZCT-2n

Acq. Operator : Location : P1-F-01  
 Injection Date : 19-Dec-17, 10:42:45  
 Acq. Method : GENERAL.M  
 Analysis Method : C:\CHEM32\1\METHODS\222.M  
 Last changed : 12/15/2017 11:15:14 AM  
 (modified after loading)

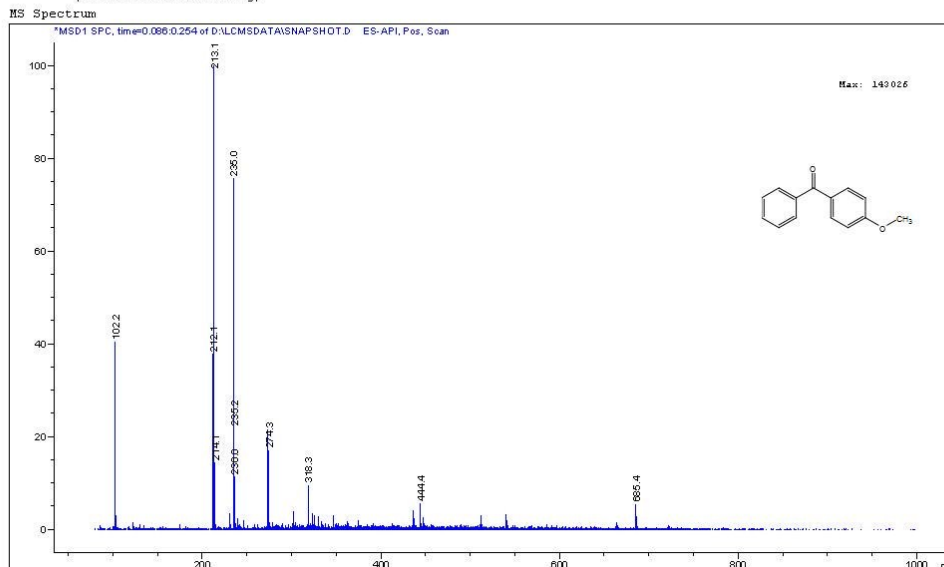

ZCT-2p-20171122-HNMR

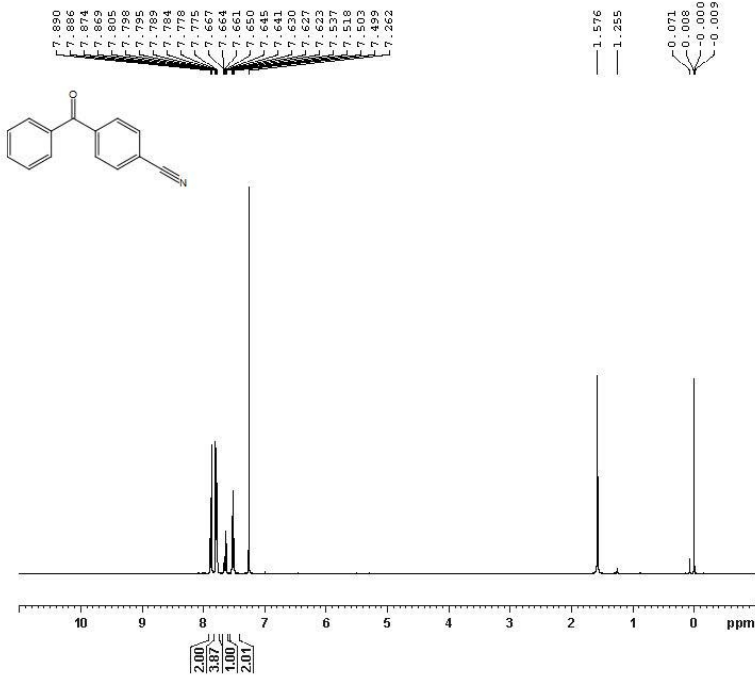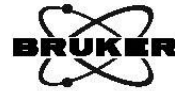

```

NAME      ZCT-2p-20171122-HNMR
EXPNO     1
PROCNO    1
Date_     20171122
Time      12.14
INSTRUM   spect
PROBHD    5 mm PABBO EB-
PULPROG   zgpg30
TD         1320
SOLVENT   CDCl3
NS         3
DS         0
SMR       8223.685 Hz
FIDRES    0.250267 Hz
AQ         1.8225444 sec
RG         203
DM         60.800 usec
DE         6.50 usec
TE         299.6 K
D1         1.00000000 sec
D11        1
===== CHANNEL f1 =====
NUC1      1H
P1        11.90 usec
PL1       -2.30 dB
PL1W      18.55620956 W
SFO1      400.1424710 MHz
SI        32768
SF        400.1400085 MHz
WDW       EM
SSB       0
LB        0.30 Hz
GB        0
PC        1.00

```

ZCT-2p-20180318-CNMR

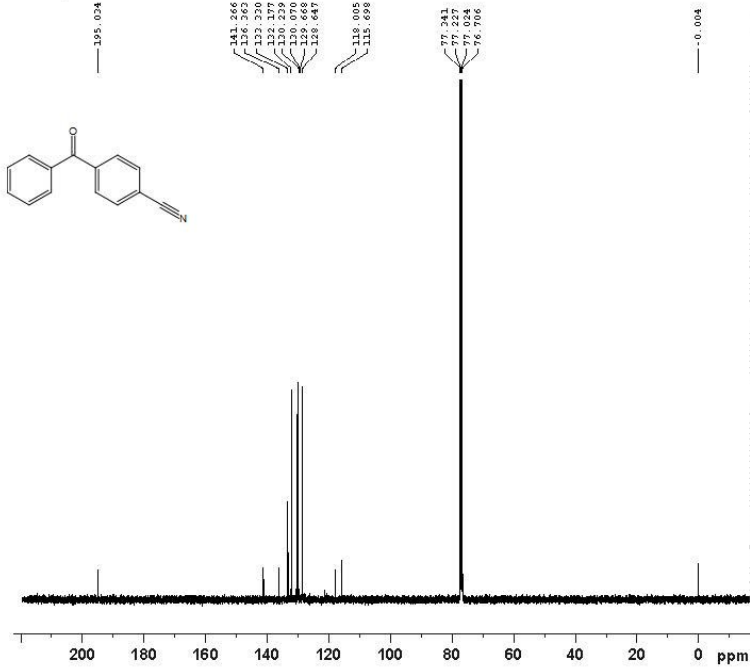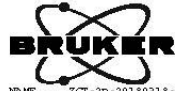

```

NAME      ZCT-2p-20180318-CNMR
EXPNO     1
PROCNO    1
Date_     20180318
Time      22.25
INSTRUM   spect
PROBHD    5 mm PABBO EB-
PULPROG   zgpg30
TD         6536
SOLVENT   CDCl3
NS         4
DS         4
SMR       24028.461 Hz
FIDRES    0.266798 Hz
AQ         1.2631868 sec
RG         203
DM         20.800 usec
DE         6.50 usec
TE         295.9 K
D1         2.00000000 sec
D11        0.02000000 sec
D10        1
===== CHANNEL f1 =====
NUC1      13C
P1        11.20 usec
PL1       -2.00 dB
PL1W      57.72554016 W
SFO1      100.6253446 MHz
===== CHANNEL f2 =====
CENTR02   waltz16
NUC2      1H
PCPD2     80.00 usec
PL2       -2.30 dB
PL12      14.25 dB
PL13      14.11 dB
EL2W      18.55620956 W
EL12W     0.41064650 W
EL13W     0.42412052 W
SFO2      400.1416006 MHz
SI        32768
SF        100.6152826 MHz
WDW       EM
SSB       0
LB        1.00 Hz
GB        0
PC        1.40

```

Print of window 80: MS Spectrum  
 Data File : D:\LCMSDATA\SNAPSHOT.D  
 Sample Name : ZCT-2p

-----  
 Acq. Operator : Location : P1-F-01  
 Injection Date : 19-Dec-17, 10:45:14  
 Acq. Method : GENERAL.M  
 Analysis Method : C:\CHEM32\1\METHODS\222.M  
 Last changed : 12/15/2017 11:15:14 AM  
 (modified after loading)

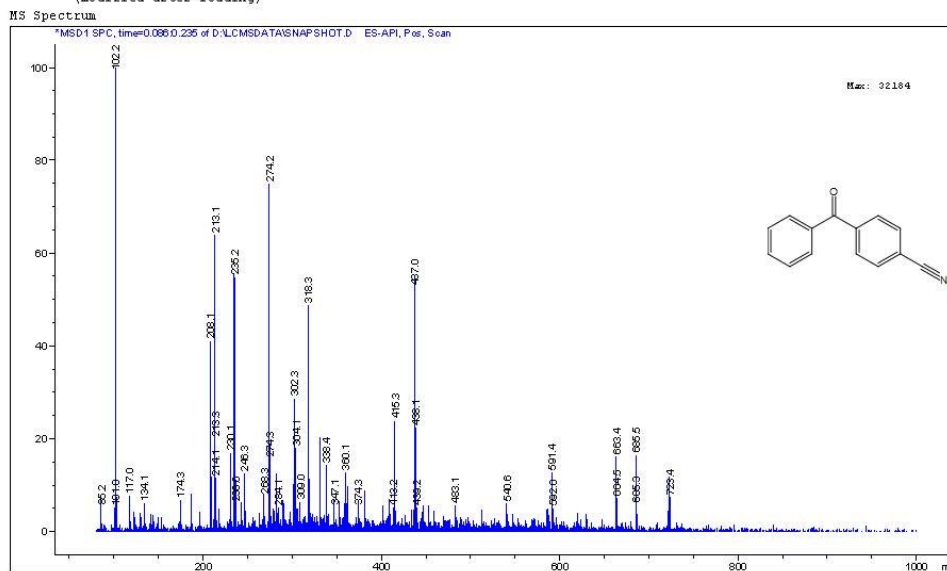

Instrument 1 12/19/2017 10:47:19 AM Page 1 of 1

ZCT-2t-201711122-HNMR

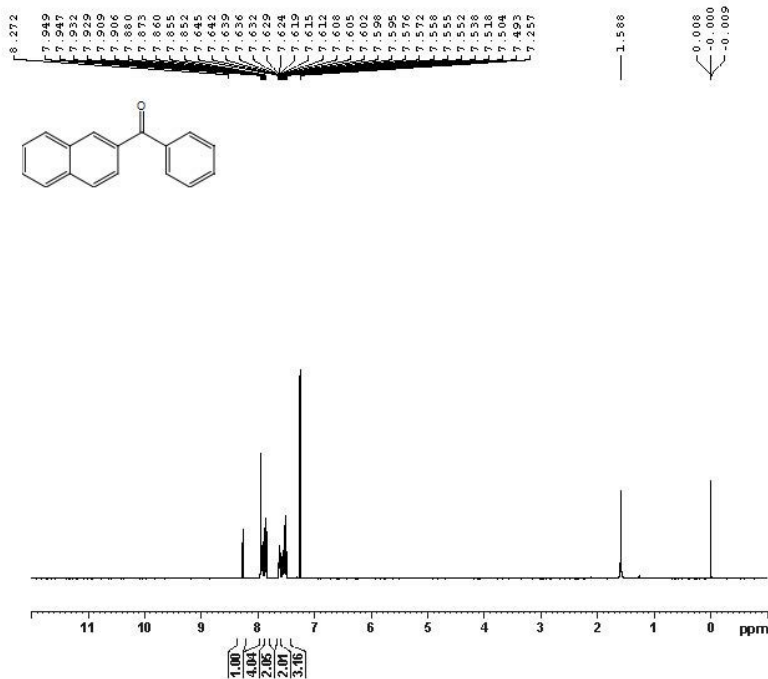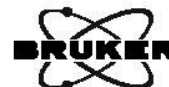

```

NAME      ZCT-2t-201711122-HNMR
EXPNO     1
PROCNO    1
Date_     20171122
Time      12.18
INSTRUM   spect
PROBHD    5 mm PABBO BB-
PULPROG   zgpg30
TD         32768
SOLVENT   CDCl3
NS         8
DS         0
SWH        8223.685 Hz
FIDRES     0.250967 Hz
AQ         1.9823444 sec
RG         202
DM         60.800 usec
DE         6.50 usec
TE         299.5 K
D1         1.00000000 sec
TDO        1

===== CHANNEL f1 =====
NUC1       1H
P1         11.90 usec
PL1        -2.30 dB
PL12       18.55620966 dB
SFO1       400.1424710 MHz
SI         32768
SF         400.1400103 MHz
WDW        EM
SSB        0
LB         0.30 Hz
GB         0
PC         1.00
  
```

ZCT-2t-20180318-CNMR

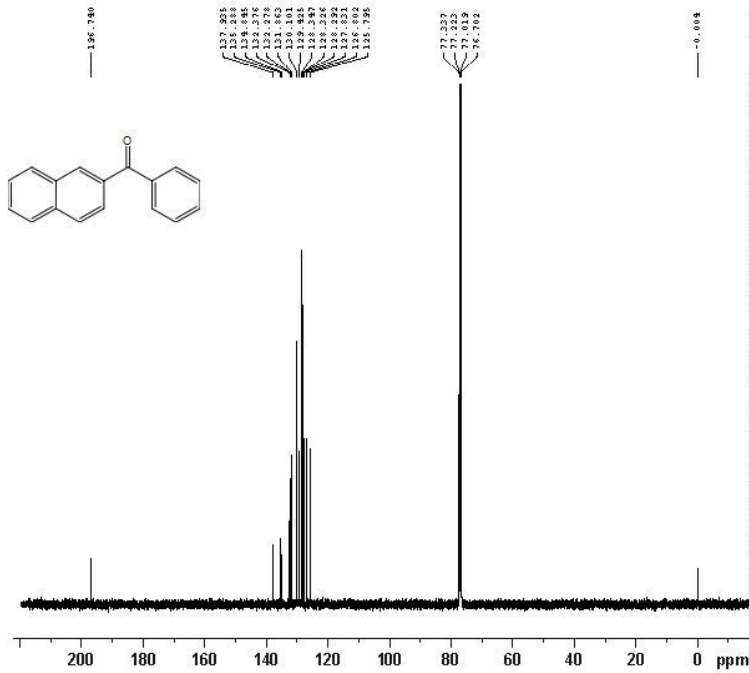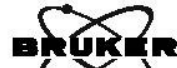

```

NAME      ZCT-2t-20180318-CNMR
EXPNO     1
PROCNO    1
Date_     20180318
Time      22.22
INSTRUM   spect
PROBHD    5 mm F4BBO BB-
PULPROG   zgpg30
TD         65536
SOLVENT   CDCl3
NS         1024
DS         4
SMH       24028.461 Hz
FIDRES    0.266798 Hz
AQ         1.3651988 sec
RG         203
DM         20.800 usec
DE         6.50 usec
TE         295.8 K
D1         2.0000000 sec
D11        0.0300000 sec
TD0        1

===== CHANNEL #1 =====
NUC1       13C
P1         11.20 usec
PL1        -2.00 dB
PL1W       5.77255400 W
SFO1       100.6262446 MHz

===== CHANNEL #2 =====
CPCPR22   waltz16
NUC2       1H
PCPD2     80.00 usec
PL2        -2.20 dB
PL2W       14.25 dB
PL2W       14.11 dB
PL2W       13.55627056 W
PL2W       0.41066650 W
PL2W       0.42412052 W
SFO2       400.1416006 MHz
SI         32768
SF         100.6152824 MHz
WDW        EM
SSB        0
LB         1.00 Hz
GB         0
PC         1.40
    
```

Print of window 80: MS Spectrum  
 Data File : D:\LCMSDATA\SNAPSHOT.D  
 Sample Name : ZCT-2t

Acq. Operator : Location : P1-F-01  
 Injection Date : 19-Dec-17, 10:55:09  
 Acq. Method : GENERAL.M  
 Analysis Method : C:\CHEM32\1\METHODS\222.M  
 Last changed : 12/15/2017 11:15:14 AM  
 (modified after loading)

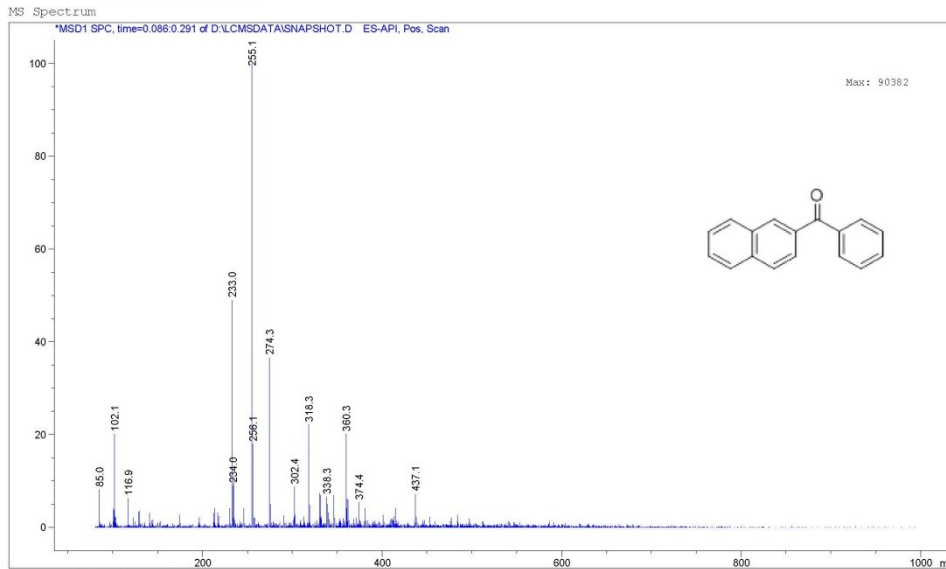

ZCT-2Y-20171228-HNMR

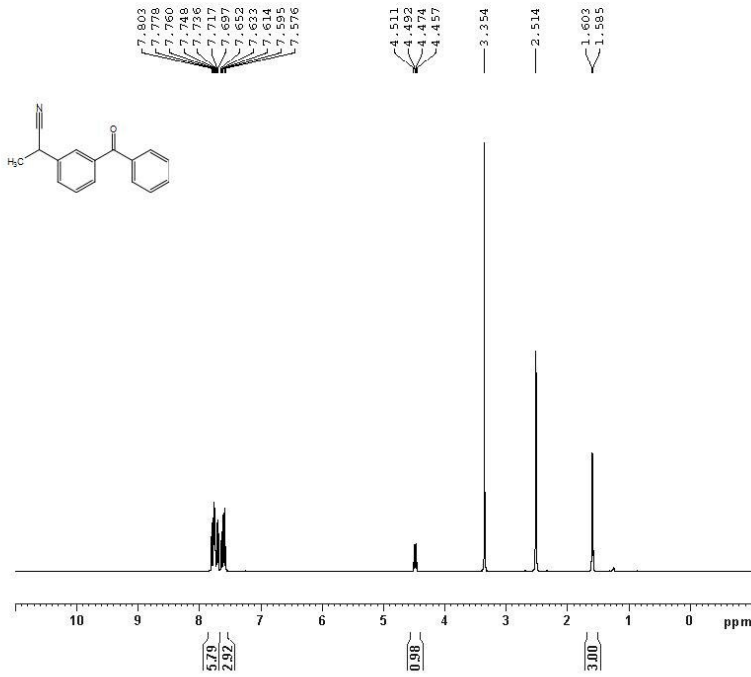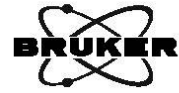

```

NAME      ZCT-2Y-20171228-HNMR
EXPNO     1
PROCNO    1
Date_     20171228
Time      17.03
INSTRUM   spect
PROBHD    5 mm PABBO BB-
PULPROG   zg30
TD         32768
SOLVENT   DMSO
NS         8
DS         0
SMH       8223.688 Hz
FIDRES    0.250967 Hz
AQ         1.9923444 sec
RG         203
DW         60.800 usec
DE         6.50 usec
TE         294.2 K
D1         1.0000000 sec
TDO        1
  
```

```

===== CHANNEL f1 =====
NUC1      1H
P1        12.10 usec
PL1       -2.30 dB
PL1W     18.55620956 W
SFO1     400.2324716 MHz
SI        32768
SF        400.2300000 MHz
WDW        EM
SSB        0
LB         0.30 Hz
GB         0
PC         1.00
  
```

ZCT-2r-20180119-CNMR

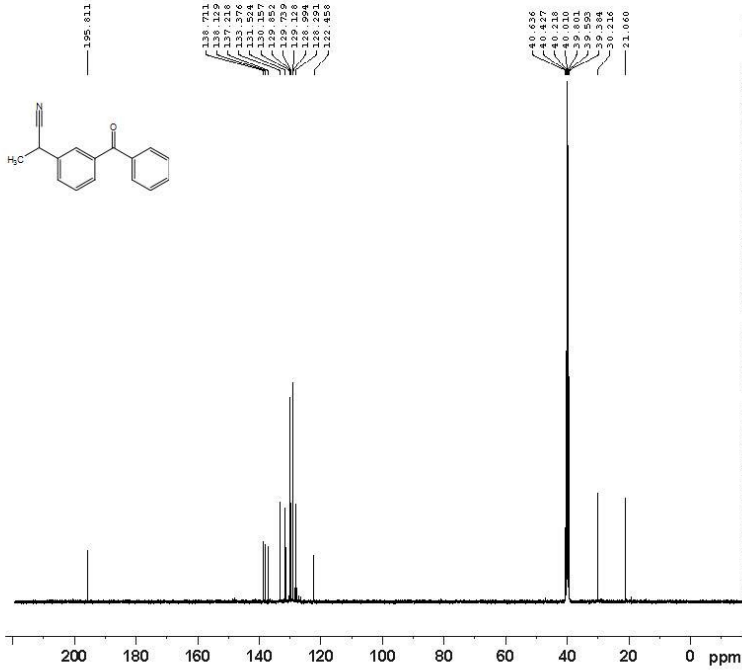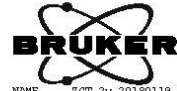

```

NAME      ZCT-2y-20180119-CNMR
EXPNO     1
PROCNO    1
Date_     20180120
Time      6.50
INSTRUM   spect
PROBHD    5 mm PABBO BB-
PULPROG   zgpg30
TD         65536
SOLVENT   DMSO
NS         1024
DS         4
SMH       24038.461 Hz
FIDRES    0.366798 Hz
AQ         1.3631988 sec
RG         203
DW         20.800 usec
DE         6.50 usec
TE         295.2 K
D1         2.0000000 sec
D11        0.0300000 sec
TDO        1
  
```

```

===== CHANNEL f1 =====
NUC1      13C
P1        12.00 usec
PL1       -2.00 dB
PL1W     57.72554016 W
SFO1     100.6279773 MHz

===== CHANNEL f2 =====
CPDPRG2   waltz16
NUC2      1H
PCPD2     80.00 usec
PL2       -2.30 dB
PL2W     14.11 dB
PL3       14.11 dB
PL3W     14.11 dB
PL2W     18.55620956 W
PL12W    0.42412052 W
PL13W    0.42412052 W
SFO2     400.2316009 MHz
SI        32768
SF        100.6279123 MHz
WDW        EM
SSB        0
LB         1.00 Hz
GB         0
PC         1.40
  
```



Print of window 80: MS Spectrum  
 Data File : D:\LCMSDATA\SNAPSHOT.D  
 Sample Name : ZCT-2y

Acq. Operator : Location : P1-F-01  
 Injection Date : 05-Feb-18, 14:12:11  
 Acq. Method : GENERAL.M  
 Analysis Method : C:\CHEM32\1\METHODS\GENERAL.M  
 Last changed : 1/31/2018 8:52:45 AM

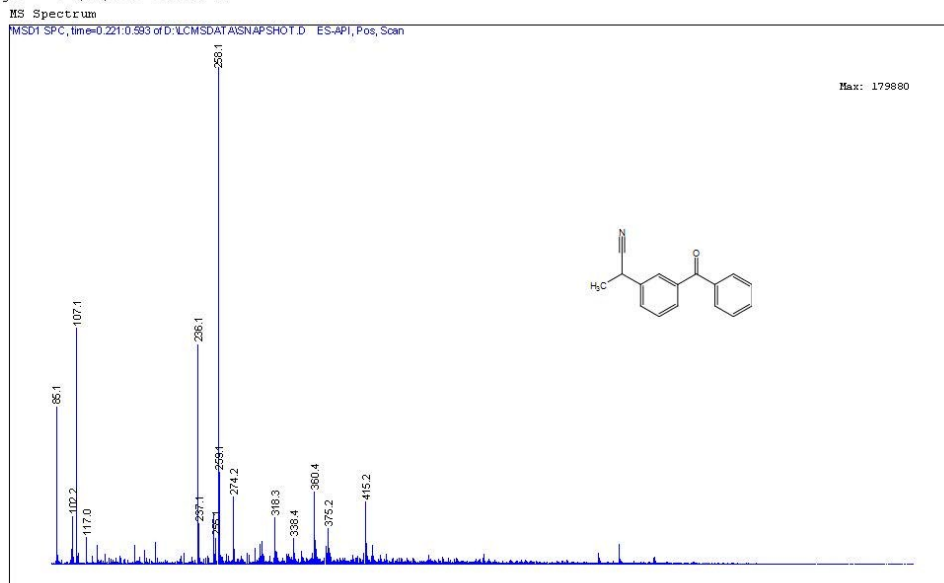

Instrument 1 2/5/2018 2:15:52 PM

Page 1 of 1

ZCT-3C-20171220-HNMR

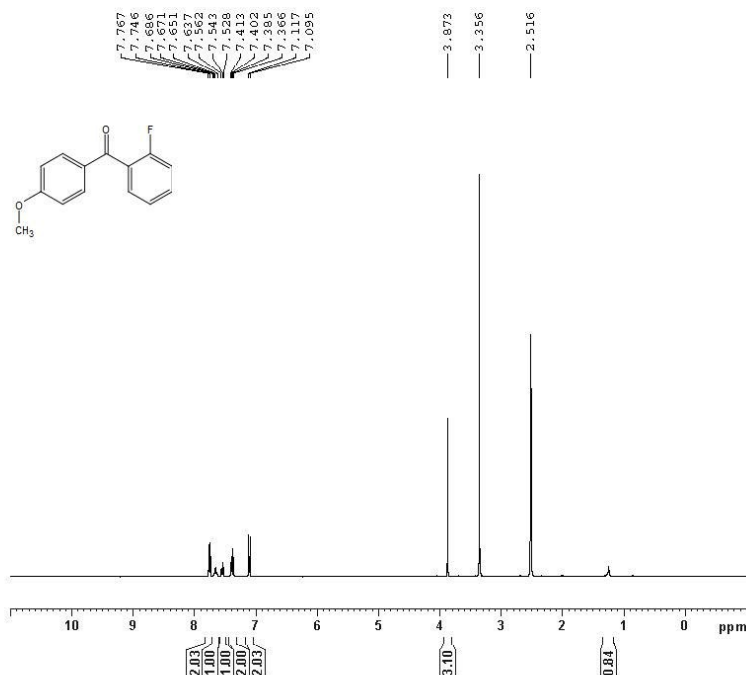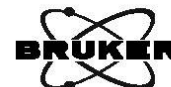

```

NAME      ZCT-3C-20171220-HNMR
EXPNO     1
PROCNO    1
Date_     20171220
Time      16.10
INSTRUM   spect
PROBHD    5 mm PABBO BB-
PULPROG   zgpg30
TD         32768
SOLVENT   DMSO
NS         8
DS         0
SWH        8223.685 Hz
FIDRES     0.250967 Hz
AQ         1.9923444 sec
RG         203
DM         60.800 usec
DE         6.50 usec
TE         300.0 K
D1         1.00000000 sec
TD0        1

===== CHANNEL f1 =====
NUC1      1H
P1         12.10 usec
PL1        -2.30 dB
PL1W       18.55620956 W
SFO1       400.2324716 MHz
SI         32768
SF         400.2300000 MHz
WDW        EM
SSB        0
LB         0.30 Hz
GB         0
PC         1.00
  
```



ZCT-3d-20171222-HNMR

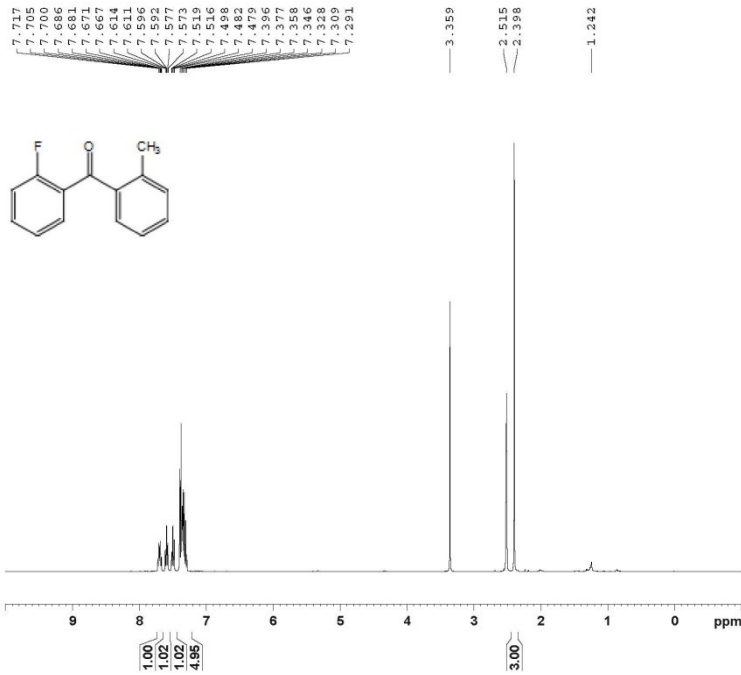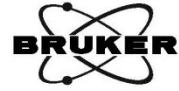

```

NAME      ZCT-3d-20171222-HNMR
EXPNO     1
PROCNO    1
Date_     20171222
Time      19.23
INSTRUM   spect
PROBHD    5 mm PABBO BB-
PULPROG   zg30
TD         32768
SOLVENT   DMSO
NS         8
DS         0
SMH       8223.685 Hz
FIDRES    0.250967 Hz
AQ         1.9923444 sec
RG         203
DM         60.800 usec
DE         6.50 usec
TE         300.0 K
D1         1.00000000 sec
TD0        1

----- CHANNEL f1 -----
NUC1       1H
P1         12.10 usec
PL1        -2.30 dB
PL1W       18.55620956 W
SFO1       400.2324716 MHz
SI         32768
SF         400.2299987 MHz
WDW        EM
SSB        0
LB         0.30 Hz
GB         0
PC         1.00
    
```

ZCT-3d-20180119-CNMR

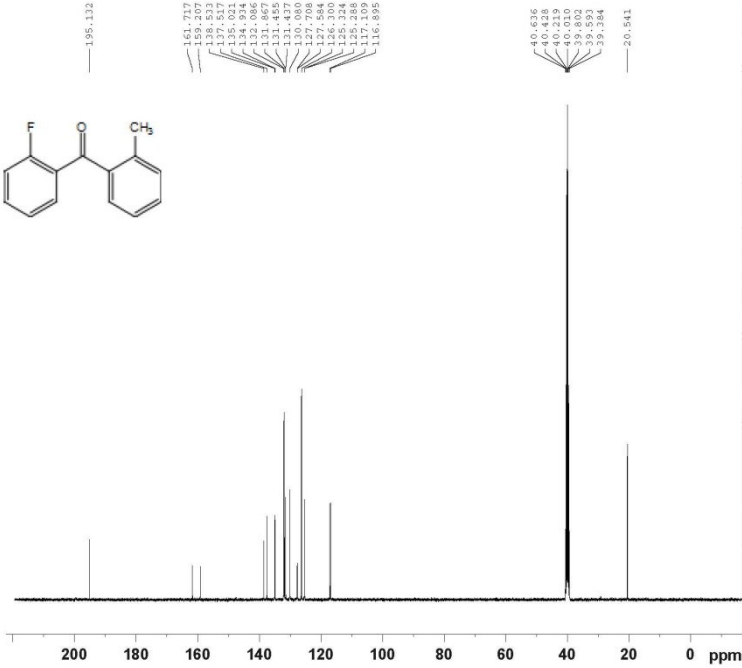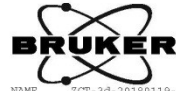

```

NAME      ZCT-3d-20180119-CNMR
EXPNO     1
PROCNO    1
Date_     20180120
Time      15.17
INSTRUM   spect
PROBHD    5 mm PABBO BB-
PULPROG   zgpg30
TD         65536
SOLVENT   DMSO
NS         1024
DS         4
SMH       24038.461 Hz
FIDRES    0.366798 Hz
AQ         1.3631988 sec
RG         203
DM         20.800 usec
DE         6.50 usec
TE         295.2 K
D1         2.00000000 sec
D11        0.03000000 sec
TD0        1

----- CHANNEL f1 -----
NUC1       13C
P1         12.00 usec
PL1        -2.00 dB
PL1W       57.72554016 W
SFO1       100.6479773 MHz

----- CHANNEL f2 -----
CFDRES2   waltz16
NUC2       1H
PCPD2     80.00 usec
PL2        -2.30 dB
PL12       14.11 dB
PL13       14.11 dB
PL1W       18.55620956 W
PL13W     0.42412052 W
SFO2       400.2316009 MHz
SI         32768
SF         100.6379133 MHz
WDW        EM
SSB        0
LB         1.00 Hz
GB         0
PC         1.40
    
```

Print of window 80: MS Spectrum  
 Data File : D:\LCMSDATA\SNAPSHOT.D  
 Sample Name : ZCT-3d

Acq. Operator : Location : P1-F-03  
 Injection Date : 05-Feb-18, 14:20:18  
 Acq. Method : GENERAL.M  
 Analysis Method : C:\CHEM32\1\METHODS\GENERAL.M  
 Last changed : 1/31/2018 8:52:45 AM

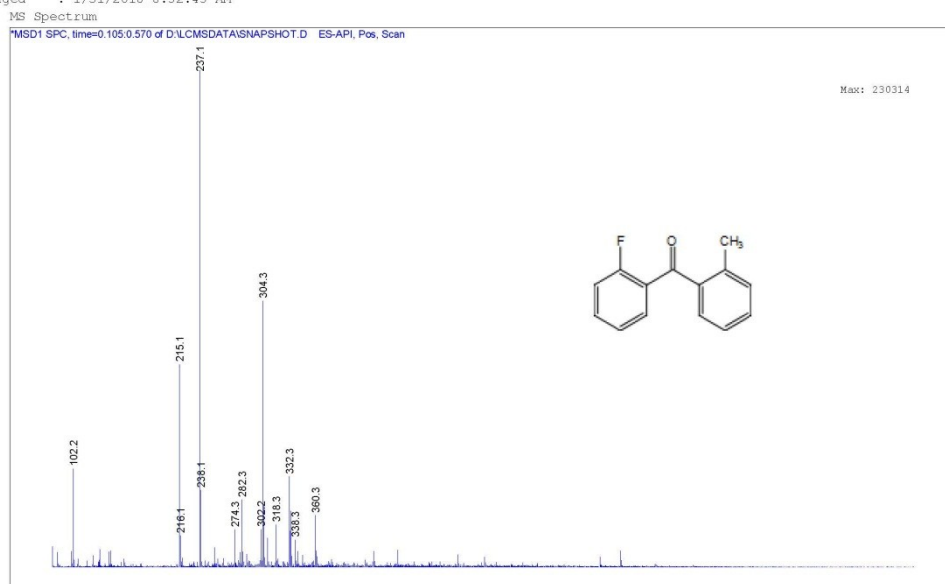

Instrument 1 2/5/2018 2:23:16 PM

Page 1 of 1

ZCT-3e-20171213-HNMR

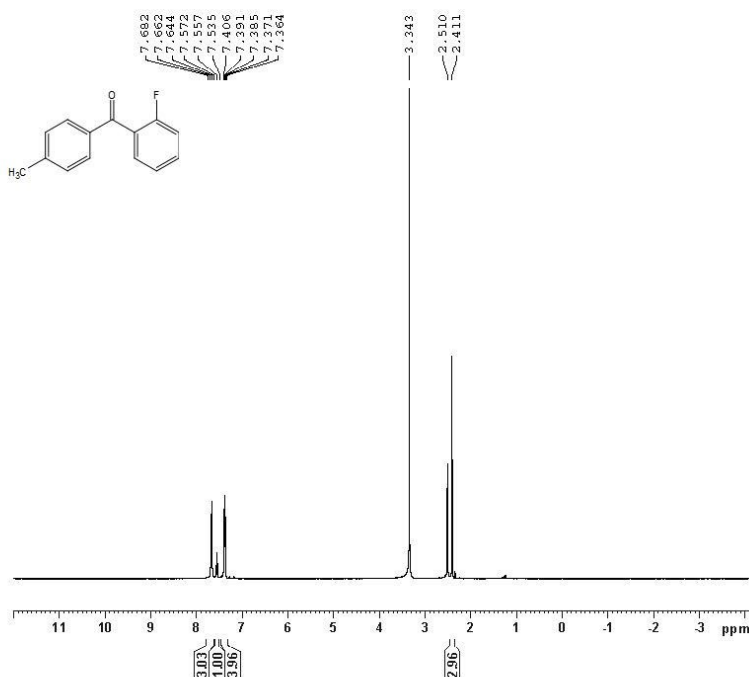

```

NAME      ZCT-3e-20171213-HNMR
EXPNO    1
PROCNO   1
Date_    20171213
Time     11.57
INSTRUM  spect
PROBHD   5 mm PABBO BB-
PULPROG  zg30
TD       32768
SOLVENT  DMSO
NS       8
DS       0
SWH      8223.685 Hz
FIDRES   0.250967 Hz
AQ       1.9923444 sec
RG       203
DW       60.800 usec
DE       6.50 usec
TE       299.4 K
D1       1.00000000 sec
TD0      1

===== CHANNEL f1 =====
NUC1     1H
P1       11.90 usec
PL1     -2.30 dB
PL1W    18.55620956 W
SFO1    400.1424710 MHz
SI       32768
SF      400.1399982 MHz
WDW      EM
SSB      0
LB       0.30 Hz
GB       0
PC       1.00
  
```

ZCT-3e-20180119-CNMR

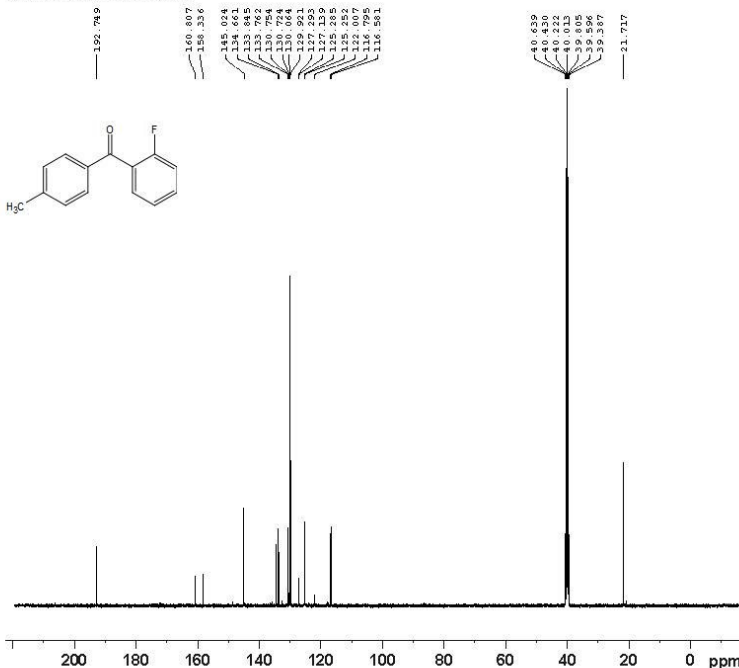

```

NAME      ZCT-3e-20180119-CNMR
EXPNO     1
PROCNO    1
Date_     20180120
Time      16.20
INSTRUM   spect
PROBHD    5 mm PABBO BB-
PULPROG   zgpg30
TD         65536
SOLVENT   DMSO
NS         1024
DS         4
SMH       24038.461 Hz
FIDRES    0.366798 Hz
AQ         1.3631988 sec
RG         203
DM         20.800 usec
DE         6.50 usec
TE         295.1 K
D1         2.0000000 sec
D11        0.0300000 sec
TD0        1

===== CHANNEL f1 =====
NUC1      13C
P1        12.00 usec
PL1       -2.00 dB
PL10      57.72554016 W
SF01      100.6479773 MHz

===== CHANNEL f2 =====
CQPPR2    waltz16
NUC2      1H
PCPD2     80.00 usec
PL2       -2.30 dB
PL12      14.11 dB
PL13      14.11 dB
PL10W     18.55620956 W
PL12W     0.42412052 W
PL13W     0.42412052 W
SF02      400.2316009 MHz
SI         32768
SF         100.6379128 MHz
WDW        EM
SSB        0
LB         1.00 Hz
GB         0
PC         1.40

```

Print of window 80: MS Spectrum  
 Data File : D:\LCMSDATA\SNAPSHOT.D  
 Sample Name : ZCT-3e

Acq. Operator : Location : P1-F-04  
 Injection Date : 05-Feb-18, 14:24:40  
 Acq. Method : GENERAL.M  
 Analysis Method : C:\CHEM32\1\METHODS\GENERAL.M  
 Last changed : 1/31/2018 8:52:45 AM

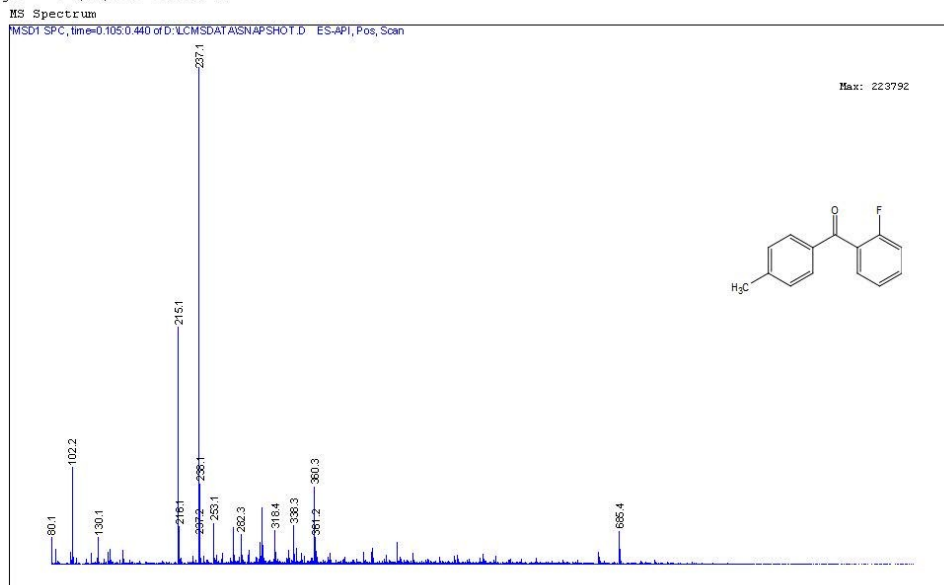



Print of window 80: MS Spectrum  
 Data File : D:\LCMSDATA\SNAPSHOT.D  
 Sample Name : ZCT-3g

Acq. Operator : Location : P1-F-05  
 Injection Date : 05-Feb-18, 14:27:32  
 Acq. Method : GENERAL.M  
 Analysis Method : C:\CHEM32\1\METHODS\GENERAL.M  
 Last changed : 1/31/2018 8:52:45 AM

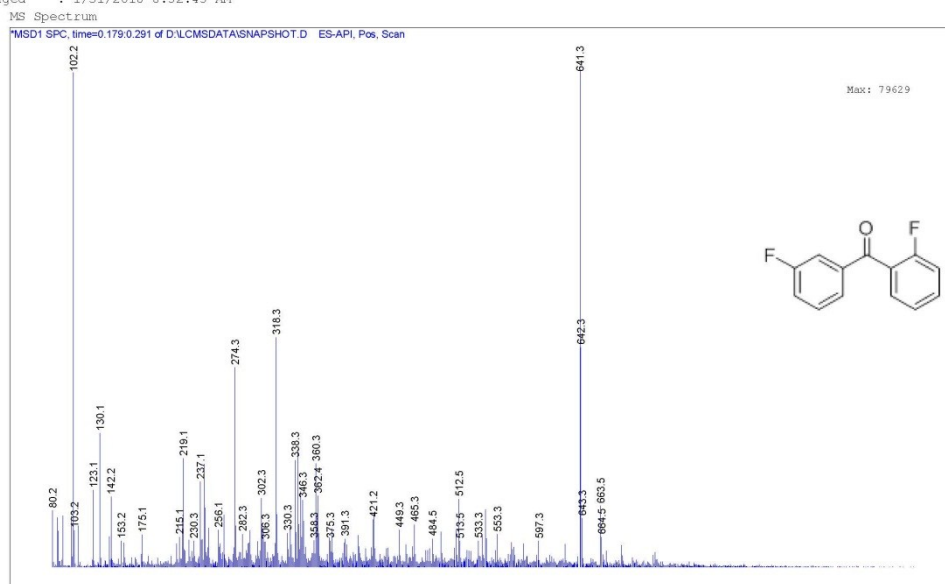

Instrument 1 2/5/2018 2:29:32 PM

Page 1 of 1

ZCT-3i-20171213-HNMR

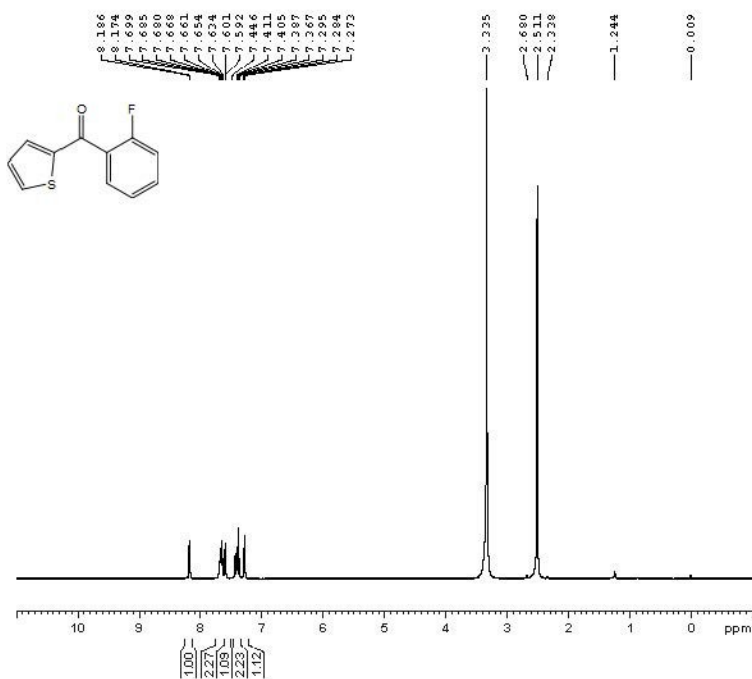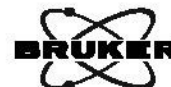

```

NAME      ZCT-3i-20171213-HNMR
EXPNO     1
PROCNO    1
Date_     20171213
Time      12.04
INSTRUM   spect
PROBHD    5 mm PABBO BB-
PULPROG   zg30
TD         32768
SOLVENT   DMSO
NS         8
DS         0
SWH        8223.685 Hz
FIDRES     0.250967 Hz
AQ         1.5923848 sec
RG         303
DQ         60.800 usec
DE         6.50 usec
TE         289.4 K
D1         1.00000000 sec
TD0        1

===== CHANNEL f1 =====
NUC1       1H
P1         11.30 usec
PL1        -2.30 dB
PL12       18.55620955 V
SFO1       400.1414710 MHz
SI         32768
SF         400.1399882 MHz
WDW        EM
SSB        0
LB         0.30 Hz
GB         0
PC         1.00
  
```

ZCT-31-20180119-CNMR

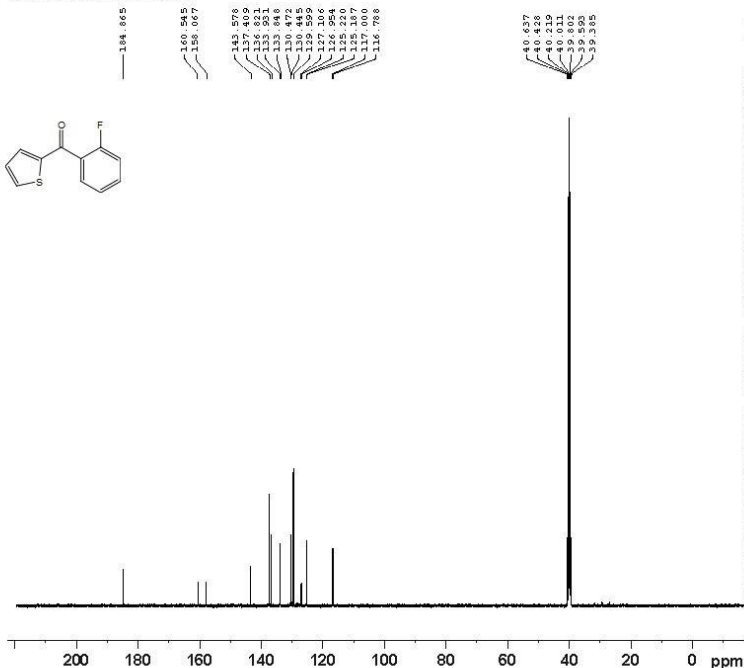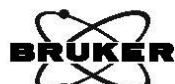

```
NAME ZCT-31-20180119-CNMR
EXPNO 1
PROCNO 1
Date_ 20180120
Time 19.28
INSTRUM spect
PROBHD 5 mm PABBO BB-
PULPROG zgpg30
TD 65536
SOLVENT DMSO
NS 1024
DS 4
SMH 24038.461 Hz
FIDRES 0.366798 Hz
AQ 1.3631988 sec
RG 203
DM 20.800 usec
DE 6.50 usec
TE 295.0 K
D1 2.0000000 sec
D11 0.0300000 sec
TDO 1

===== CHANNEL f1 =====
NUC1 13C
P1 12.00 usec
PL1 -2.00 dB
PL10 57.72554016 W
SF01 100.6479773 MHz

===== CHANNEL f2 =====
CQPPR2 waltz16
NUC2 1H
PCPD2 80.00 usec
PL2 -2.30 dB
PL12 14.11 dB
PL13 14.11 dB
PL10W 18.55620956 W
PL12W 0.42412052 W
PL13W 0.42412052 W
SF02 400.2316009 MHz
SI 32768
SF 100.6379128 MHz
WDW EM
SSB 0
LB 1.00 Hz
GB 0
PC 1.40
```

11:18:32  
20180823-1B 180 (3.123)

C11H7FOS

23-Aug-2018  
1: TOF MS ES+  
1.85e3

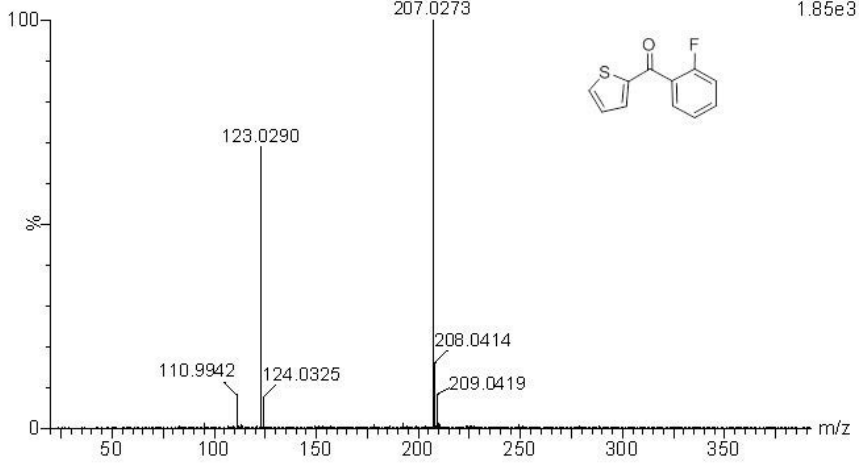





Print of window 80: MS Spectrum  
 Data File : D:\LCHSDATA\SNAPSHOT.D  
 Sample Name : ZCT-3j

=====  
 Acq. Operator : Location : P1-P-07  
 Injection Date : 05-Feb-18, 14:34:42  
 Acq. Method : GENERAL.M  
 Analysis Method : C:\CHEM32\1\METHODS\GENERAL.M  
 Last changed : 1/31/2018 8:52:45 AM

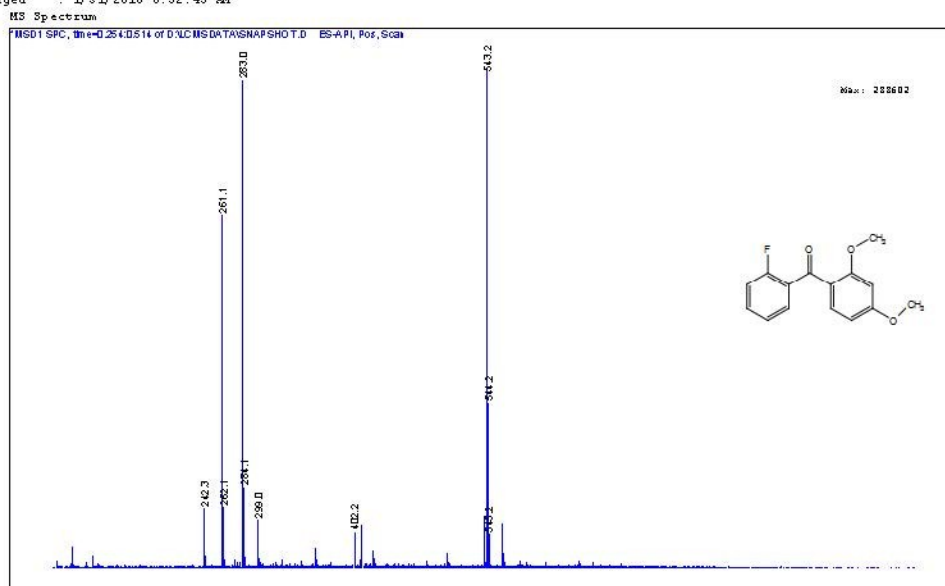

ZCT-3P-20180117-HNMR

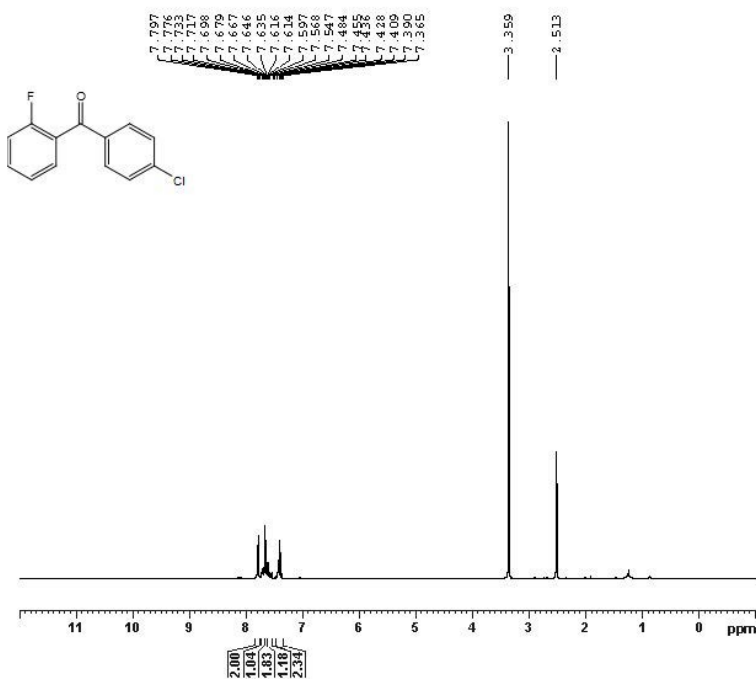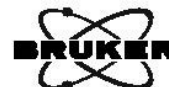

```

NAME      ZCT-3P-20180117-HNMR
EXPNO     1
PROCNO    1
Date_     20180117
Time      11.34
INSTRUM   spect
PROBHD    5 mm PABBO BB-
PULPROG   zg30
TD         32768
SOLVENT    DMSO
NS         8
DS         0
SWH        8223.685 Hz
FIDRES     0.250967 Hz
AQ         1.9923444 sec
RG         203
DQ         60.900 usec
DE         6.50 usec
TE         300.0 K
DL         1.0000000 sec
TDO        1

===== CHANNEL f1 =====
NUC1      1H
P1         12.10 usec
PL1        -2.30 dB
PL12       19.55620956 0
SFO1       400.2324716 MHz
SI         32768
SF         400.2300000 MHz
WDW        EM
SSB        0
LB         0.30 Hz
GB         0
PC         1.00
  
```

ZCT-3p-20180119-CNMR

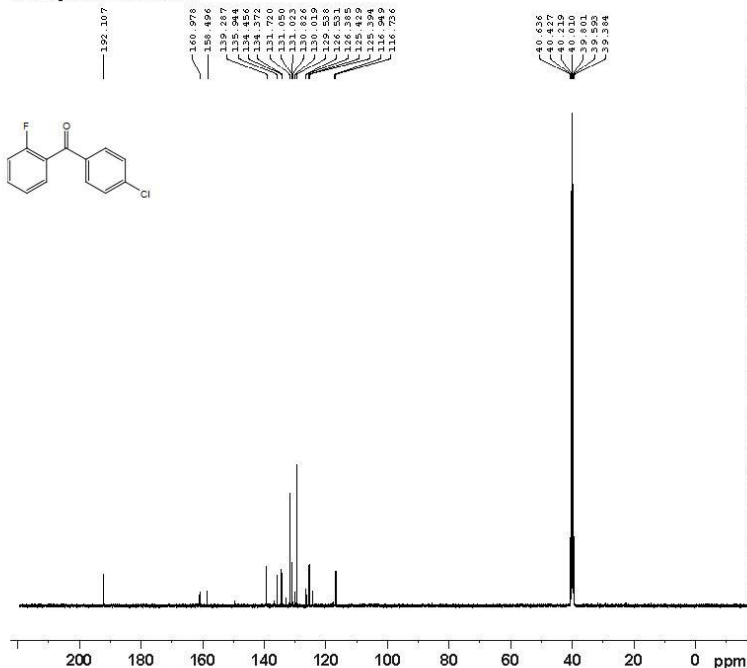

```

NAME      ZCT-3p-20180119-CNMR
EXPNO    1
PROCNO   1
Date_    20180120
Time     20.31
INSTRUM  spect
PROBHD   5 mm PABBO BB-
PULPROG  zgpg30
TD        65526
SOLVENT  DMSO
NS        1024
DS        4
SMH       24038.461 Hz
FIDRES   0.366798 Hz
AQ        1.3631988 sec
RG        203
DM        20.800 usec
DE        6.50 usec
TE        295.0 K
D1        2.0000000 sec
D11       0.0300000 sec
TD0       1

===== CHANNEL f1 =====
NUC1      13C
P1        12.00 usec
PL1       -2.00 dB
PL10      57.72554016 W
SF01      100.62799773 MHz

===== CHANNEL f2 =====
CQPPRO2  waltz16
NUC2      1H
PCPD2    80.00 usec
PL2       -2.30 dB
PL12      14.11 dB
PL13      14.11 dB
PL10W    18.55620856 W
PL12W    0.42412052 W
PL13W    0.42412052 W
SF02     400.2316009 MHz
SI        32768
SF        100.62799773 MHz
WDW       EM
SSB       0
LB        1.00 Hz
GB        0
PC        1.40
    
```

Print of window 80: MS Spectrum  
 Data File : D:\LCMSDATA\SNAPSHOT.D  
 Sample Name : ZCT-3p

Acq. Operator : Location : P1-F-08  
 Injection Date : 05-Feb-18, 14:38:36  
 Acq. Method : GENERAL.M  
 Analysis Method : C:\CHEM32\1\METHODS\GENERAL.M  
 Last changed : 1/31/2018 8:52:45 AM

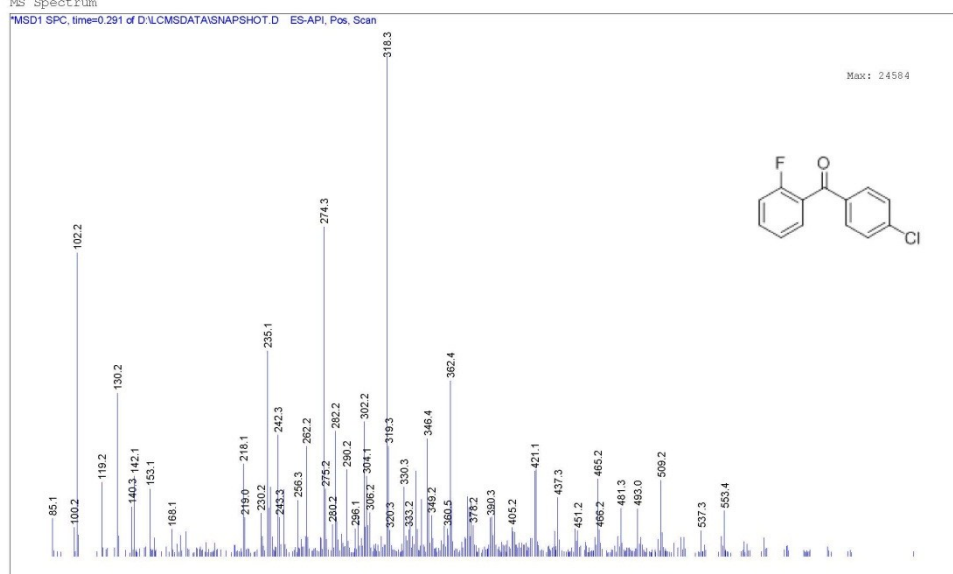

# GC-MS data of 3a from batch chemistry

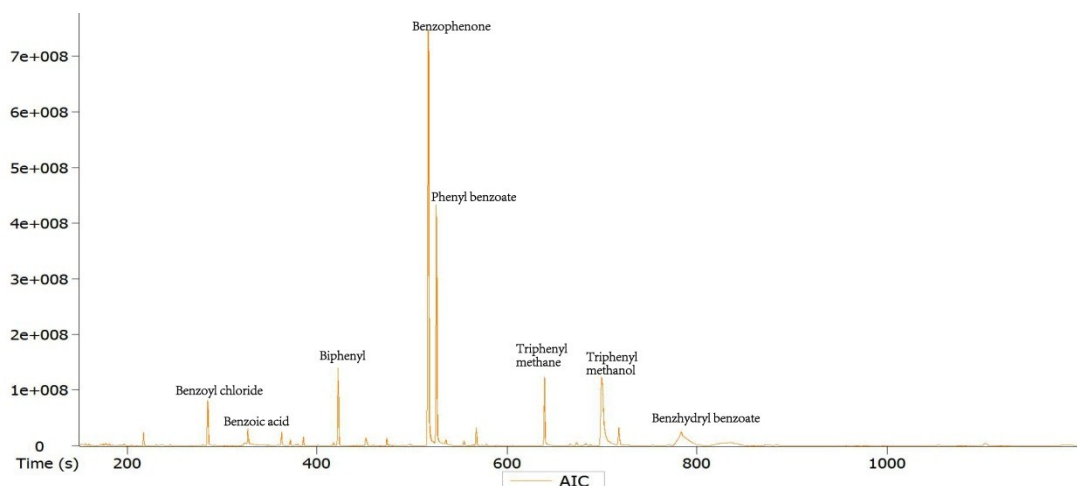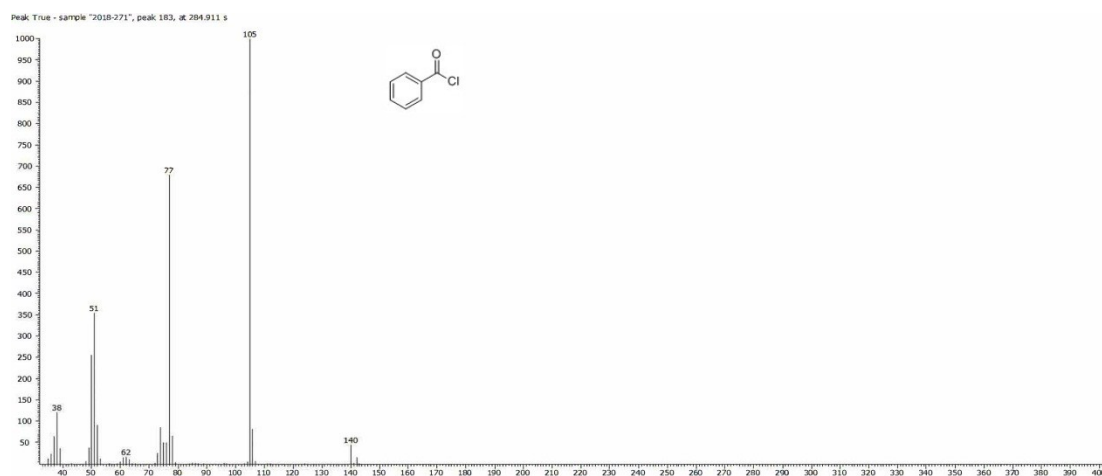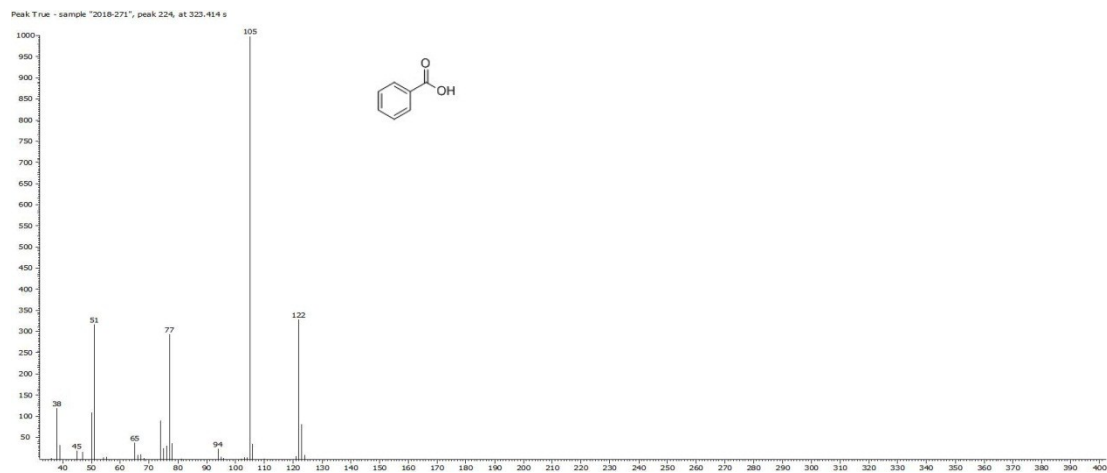

Peak True - sample "2018-271", peak 383, at 422.122 s

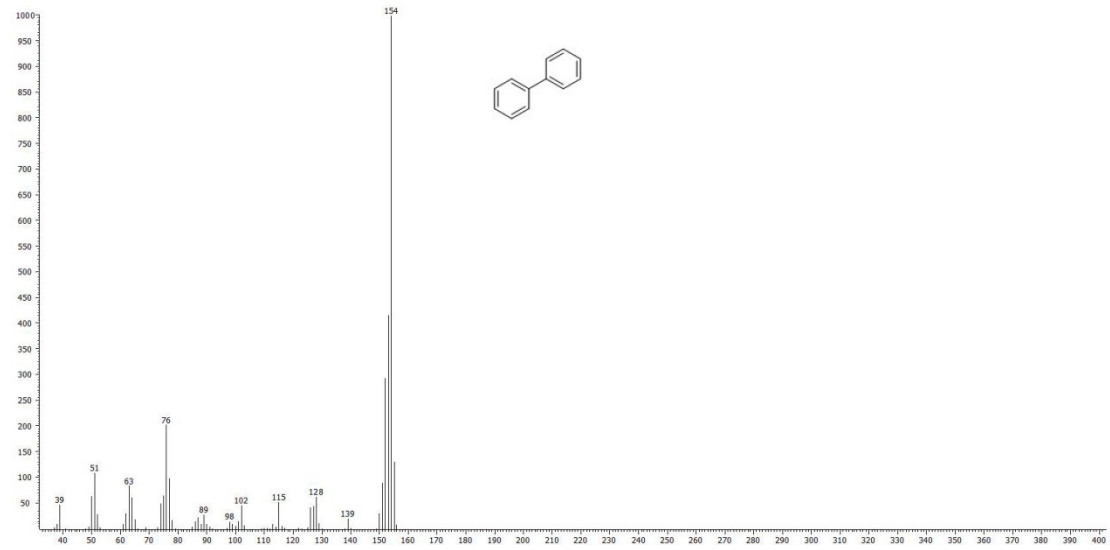

Peak True - sample "2018-271", peak 562, at 517.029 s

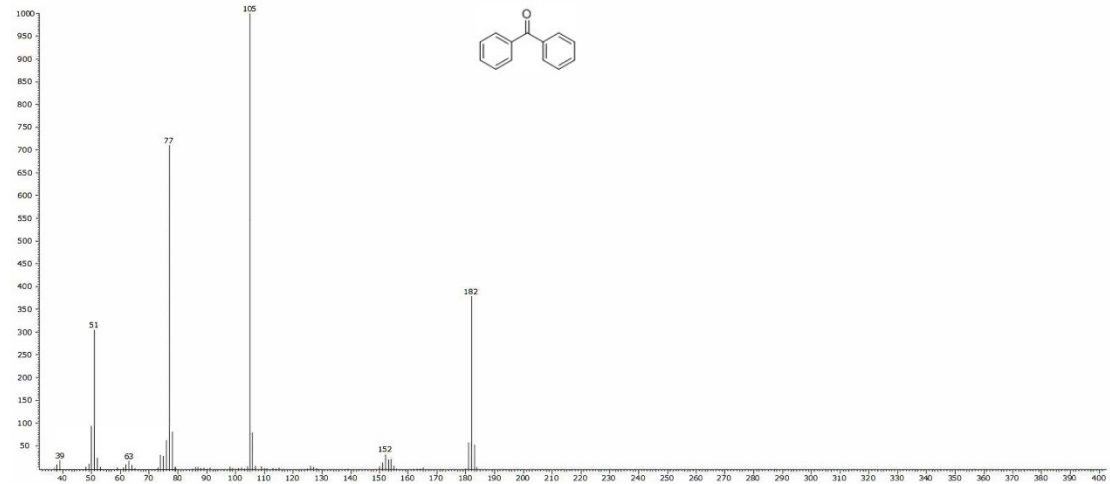

Peak True - sample "2018-271", peak 591, at 525.63 s

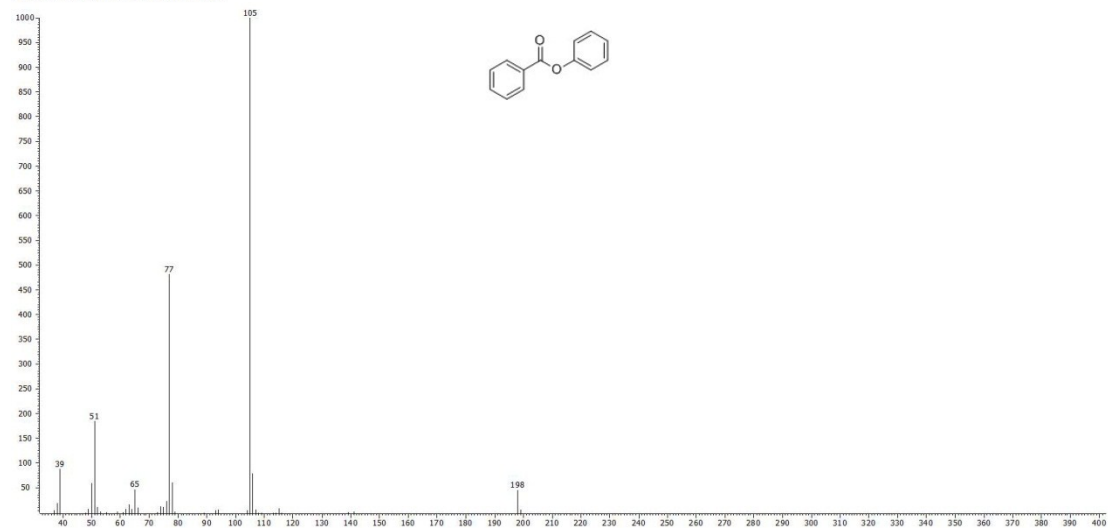

Peak True - sample "2018-271", peak 889, at 639.139 s

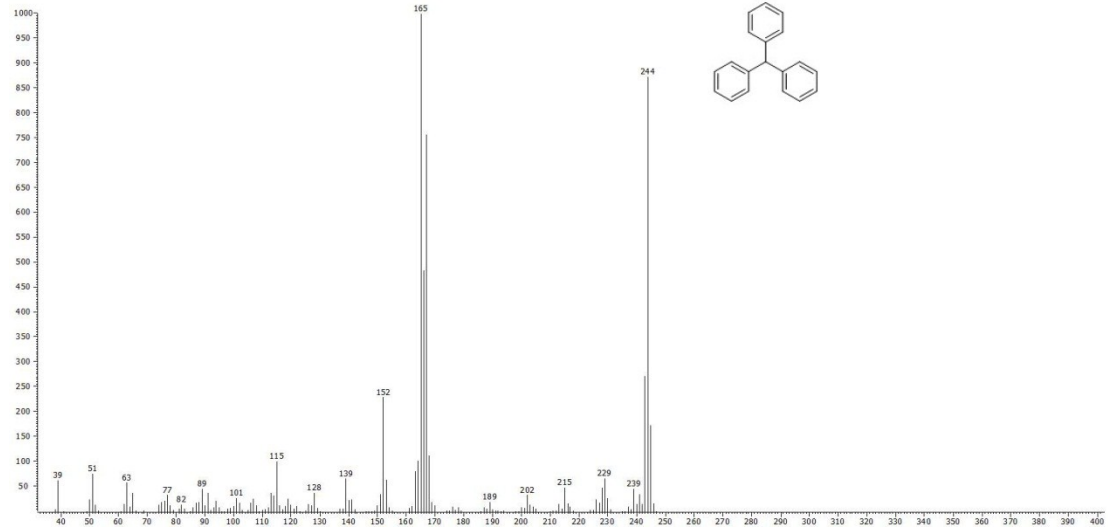

Peak True - sample "2018-271", peak 1067, at 699.444 s

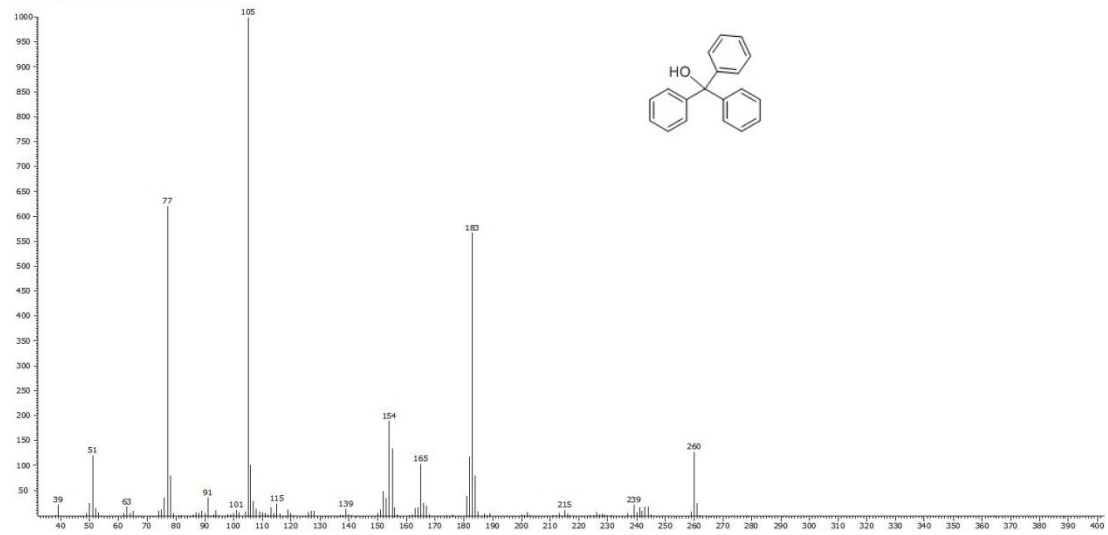

Peak True - sample "2018-271", peak 1279, at 783.251 s (Spec # 6332)

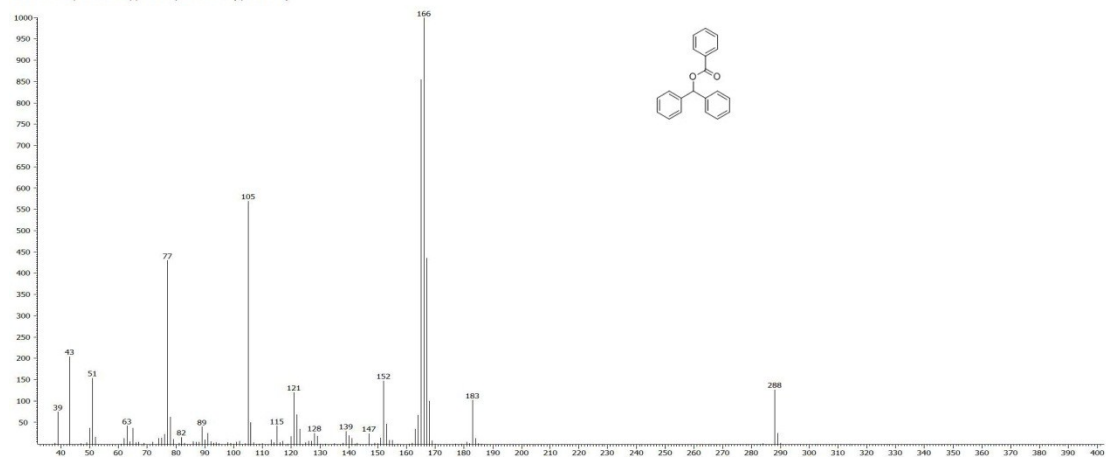

# GC-MS data of 3a from flow chemistry

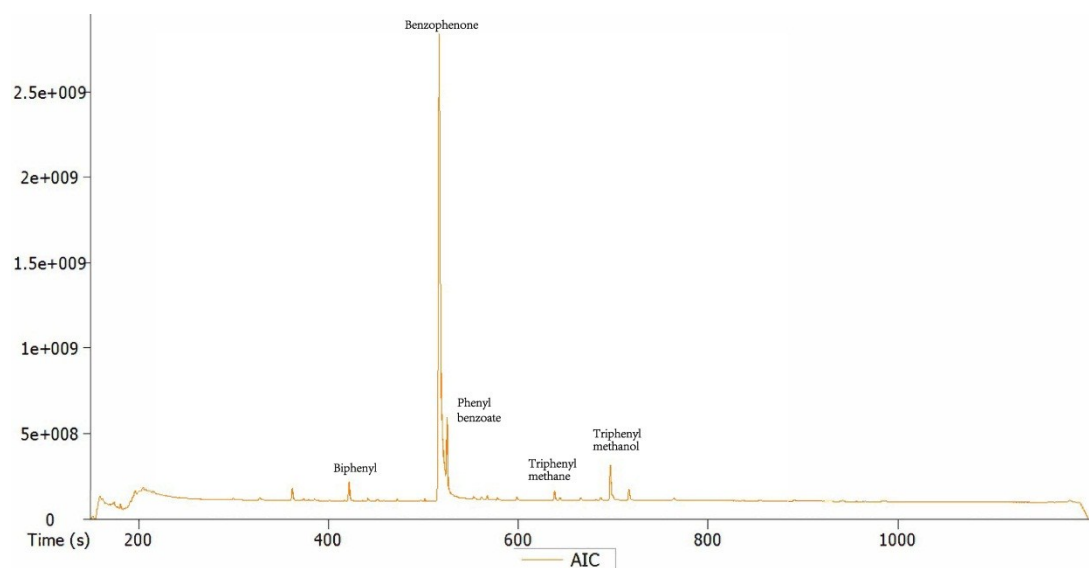

Peak True - sample "2018-277", peak 1071, at 421.822 s (Spec # 2718)

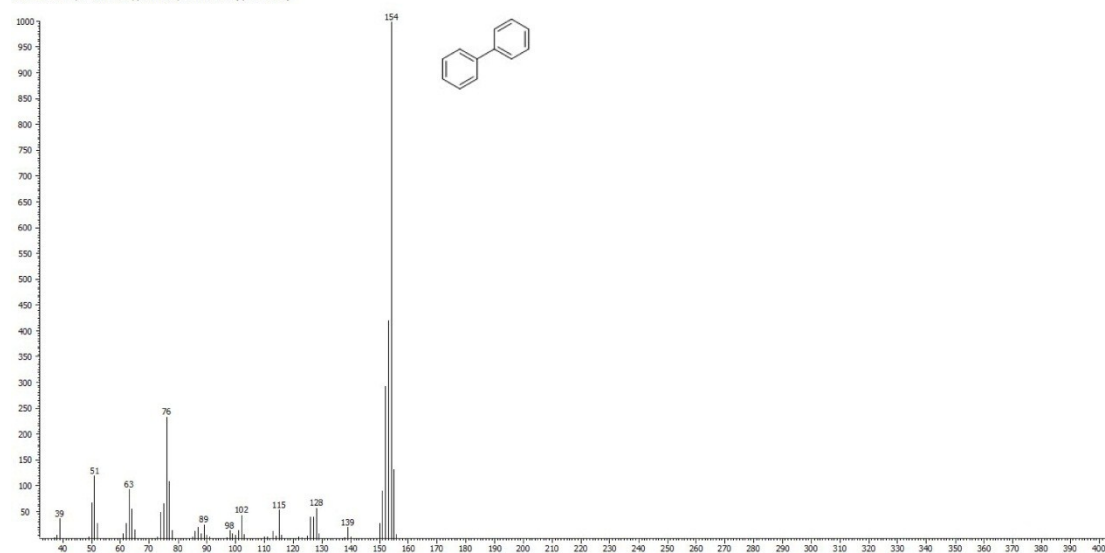

Peak True - sample "2018-277", peak 1459, at 516.829 s (Spec # 3668)

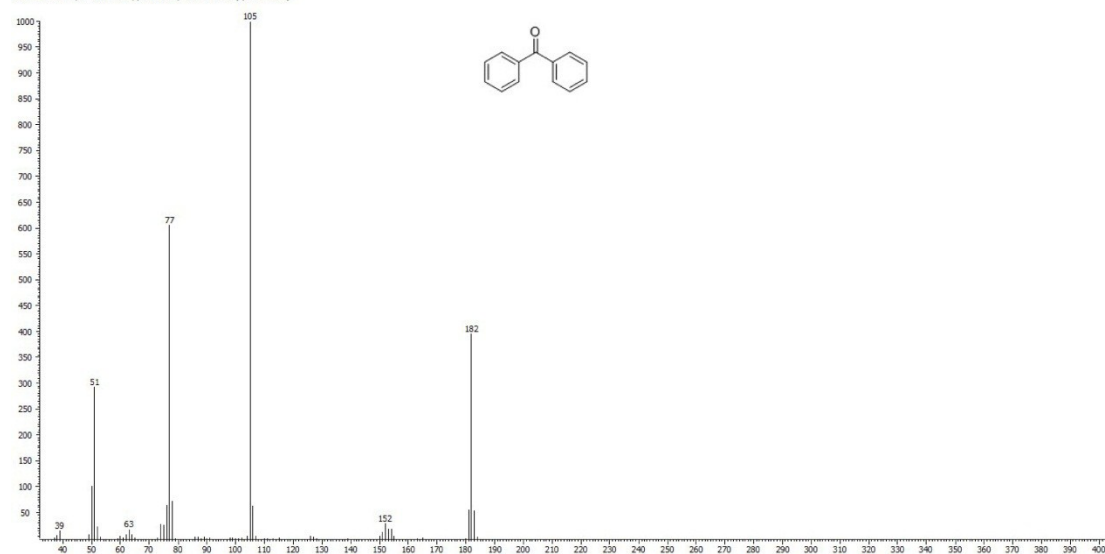

Peak True - sample "2018-277", peak 1480, at 525.03 s (Spec # 3750)

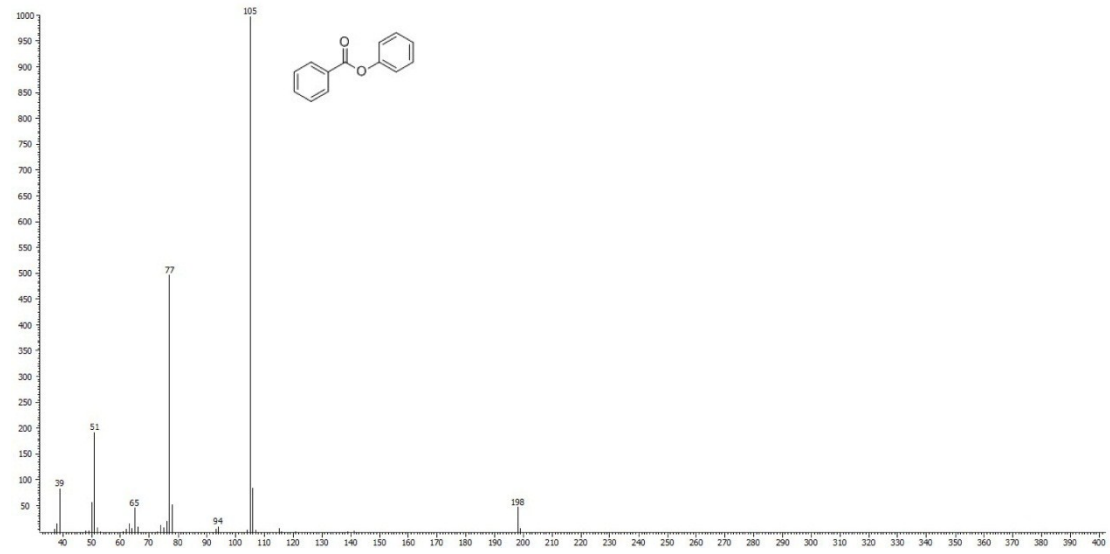

Peak True - sample "2018-277", peak 1811, at 637.539 s (Spec # 4875)

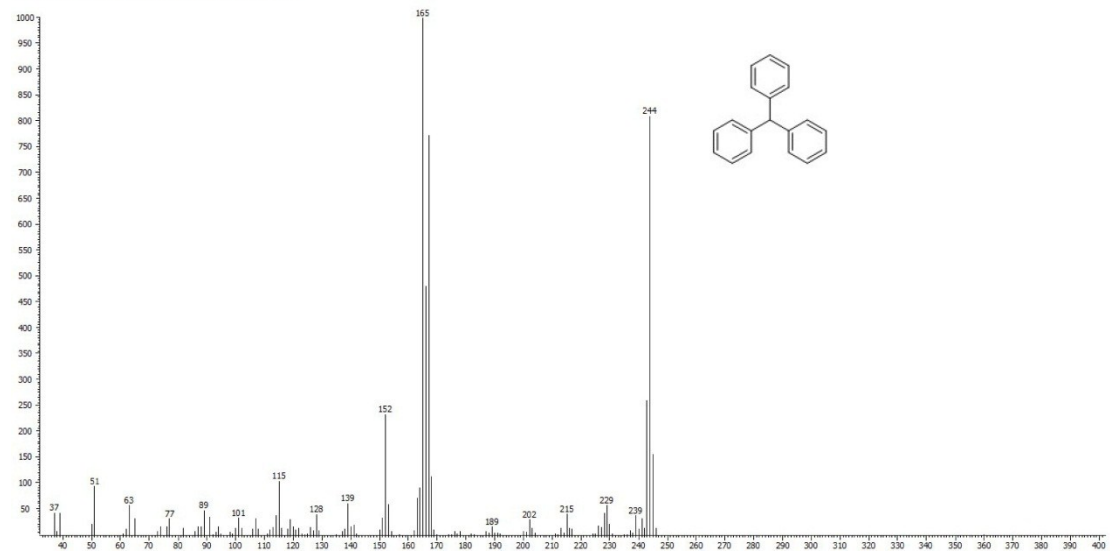

Peak True - sample "2018-277", peak 1979, at 697.144 s (Spec # 5471)

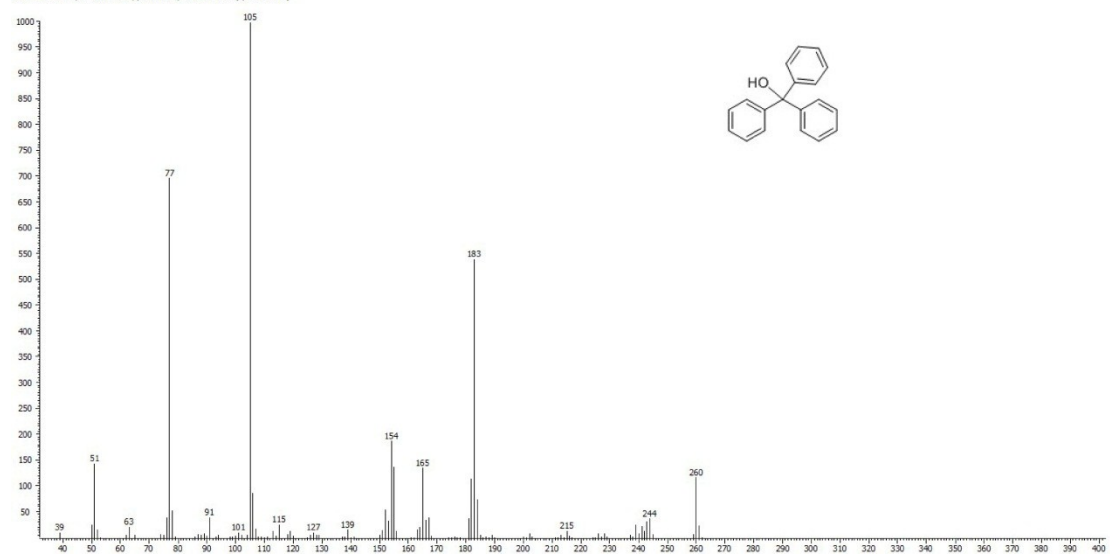

Supplement: c8ra07447j1.pdf [file c8ra07447j1.pdf]
